---

# THE COMPLEX INTERPLAY BETWEEN RISK TOLERANCE AND THE SPREAD OF INFECTIOUS DISEASES

---

**Maximilian Nguyen**  
Lewis-Sigler Institute  
Princeton University  
Princeton, NJ 08544  
mmnguyen@princeton.edu

**Ari Freedman**  
Department of Ecology and Evolutionary Biology  
Princeton University  
Princeton, NJ, USA  
arisf@princeton.edu

**Matthew Cheung**  
Program in Applied and Computational Mathematics  
Princeton University  
Princeton, NJ, USA  
matthew.cheung@princeton.edu

**Chadi Saad-Roy**  
Miller Institute for Basic Research in Science  
Department of Integrative Biology  
University of California, Berkeley  
Berkeley, CA, USA  
csaadroy@berkeley.edu

**Baltazar Espinoza**  
Biocomplexity Institute  
University of Virginia  
Charlottesville, VA, USA  
baltazar.espinoza@virginia.edu

**Bryan Grenfell**  
Department of Ecology and Evolutionary Biology  
Princeton University  
Princeton, NJ, USA  
grenfell@princeton.edu

**Simon Levin**  
Department of Ecology and Evolutionary Biology  
Princeton University  
Princeton, NJ, USA  
slevin@princeton.edu

September 18, 2024

## ABSTRACT

Risk-driven behavior provides a feedback mechanism through which individuals both shape and are collectively affected by an epidemic. We introduce a general and flexible compartmental model to study the effect of heterogeneity in the population with regards to risk tolerance. The interplay between behavior and epidemiology leads to a rich set of possible epidemic dynamics. Depending on the behavioral composition of the population, we find that increasing heterogeneity in risk tolerance can either increase or decrease the epidemic size. We find that multiple waves of infection can arise due to the interplay between transmission and behavior, even without the replenishment of susceptibles. We find that increasing protective mechanisms such as the effectiveness of interventions, the number of risk-averse people in the population, and the duration of intervention usage reduces the epidemic overshoot. When the protection is pushed past a critical threshold, the epidemic dynamics enter an underdamped regime where the epidemic size exactly equals the herd immunity threshold and overshoot is eliminated. Lastly, we can find regimes where epidemic size does not monotonically decrease with a population that becomes increasingly risk-averse.

## 1 Introduction

Recent outbreaks such as the COVID-19 pandemic, the 2014 Ebola outbreak, the 2009 influenza A (H1N1) pandemic, and the 2002 SARS epidemic brought to light many of the challenges of mounting an effective and unified epidemic response in a country as large and as diverse as the United States. Particularly during the COVID-19 pandemic, people were split in opinion on questions such as the origin of the virus [1], whether they would social distance or wear a mask [2–4], or whether the country should even have a pandemic response at all [5]. As time progressed, the situation became more dire and the death toll accumulated. People then had a new battery of questions to address, such as whether or not they would adhere to mandatory lock-downs [6–8] or whether they felt comfortable using the new mRNA vaccines [9, 10]. Compounding the issue were the multiple streams of information and potential misinformation spread through social media and other channels [11–14]. People’s stances on the questions and issues were diverse, arising from the milieu of differences in culture, geography, scientific education, sources of information, political leanings, and individual identity [15–17].

Taken altogether, these differences within the population reflect a spectrum of people’s risk tolerances to a circulating infectious disease. For any given intervention, such as social distancing, wearing a mask, or taking a vaccine, each person in the population falls somewhere on a spectrum of willingness to adopt the intervention. Given a threat level of an infectious disease in the population, some people will readily wear masks, whereas other people will refuse to.

In this study, we aim to analyze the impact of heterogeneity in risk tolerance and the resulting behavioral response on the dynamics of epidemics. We seek to add to a burgeoning literature on the impact of human behavior in epidemic response [18–32], which the recent pandemic highlighted as an area for further exploration in preparation for the next large scale global health crisis [33–35]. To study the impact of heterogeneity in risk tolerance on epidemic dynamics, we introduce a simple and flexible modeling framework based on ordinary differential equations that can be used for different interventions and an arbitrary partitioning of the population with regard to risk tolerance and behavioral responses. We will examine and discuss potential interesting outcomes that can arise from coupling individual-level preferences and population-level epidemiology.

## 2 Results

### Model of Adaptive Intervention Usage under Heterogeneous Risk Tolerance

Here we assume people’s risk aversion manifests as the rate at which they adopt individual interventions in response to an infectious disease outbreak. The intuition underlying this paradigm is that more risk-averse individuals are more sensitive to becoming sick and thus will adopt interventions at a faster rate than more risk-tolerant people. We consider the following SPIR compartmental model of a population with  $n$  differing levels of risk tolerance (1-4). This model features four types of classes: unprotected susceptible ( $S$ ), protected susceptible ( $P$ ), infectious ( $I$ ), and recovered with permanent immunity ( $R$ ). Since there are  $n$  differing levels of risk tolerance, we subdivide the susceptible population into  $n$  discrete groups indexed by  $i$ , where  $i \in \{1, 2, \dots, n\}$ . Each tolerance level is characterized by an intervention adoption rate parameter ( $\lambda_i$ ) and an intervention relaxation rate parameter ( $\delta_i$ ). Transitions of susceptibles between their unprotected class ( $S_i$ ) and their corresponding protected class ( $P_i$ ) are governed by the corresponding parameters of the same index ( $\lambda_i, \delta_i$ ). Overall, the system is governed by  $3 + 2n$  parameters: a transmission rate parameter ( $\beta$ ), a recovery rate parameter ( $\gamma$ ), an intervention effectiveness parameter ( $\epsilon$ ), and an intervention adoption rate ( $\lambda_i$ ) and intervention relaxation rate ( $\delta_i$ ) for each tolerance level. Since we always assume there are no protected individuals initially, the dynamics of the infected compartment is initially only a function of the transmission and recovery parameters. Thus we can use the typical definition for the basic reproduction number ( $R_0 \equiv \frac{\beta}{\gamma}$ ).

$$\frac{dS_i}{dt} = -\beta S_i I - \lambda_i S_i I + \delta_i P_i \quad (1)$$

$$\frac{dP_i}{dt} = -(1 - \epsilon)\beta P_i I - \delta_i P_i + \lambda_i S_i I \quad (2)$$

$$\frac{dI}{dt} = -\gamma I + \sum_{i=1}^n (\beta S_i I + (1 - \epsilon)\beta P_i I) \quad (3)$$

$$\frac{dR}{dt} = \gamma I \quad (4)$$

The transition from the unprotected susceptible state to the protected susceptible state represents individuals implementing an intervention that confers them protection against disease transmission from an infected individual. The rate at which intervention adoption occurs may be driven by individuals considering information such as the epidemic incidence rate (e.g. cases per day), the total number of infected individuals in the population (e.g. total number of active cases), and mortality rate (e.g. deaths per day) [22]. Here we assume that individuals have knowledge about the total number of infected individuals ( $I$ ) and respond accordingly. Parameterizing each person’s individual risk tolerance by  $\lambda_i$ , we assume each individual person adopts an intervention at a rate  $\lambda_i I$ . Then, if there are  $S_i$  number of people that behave exactly the same (i.e. have the same level of risk-aversion), then at the population scale there is a collective adoption rate of  $\lambda_i S_i I$ . The same reasoning holds for each of the  $n$  tolerance levels. We also consider a model where the adoption rate is driven by individuals reacting to the incidence rate (Supplemental Materials); while this produces a more complex mathematical model, the results are qualitatively similar.

The effectiveness of the intervention being used is captured by the parameter  $\epsilon$ , which linearly scales down the transmission rate between infected and protected susceptibles. In the limit of  $\epsilon = 1$ , the intervention is perfectly effective and protected individuals cannot become infected. In the limit of  $\epsilon = 0$  then the intervention is completely ineffective, which reduces the model to an SIR model without interventions. For simplicity, we assume each epidemic features only a single type of intervention (whether that be masking, social distancing, vaccines, etc.) and that the effectiveness of an intervention is identical across the population. In reality, multiple interventions may be available concurrently, which would drive additional variation in behavior due to differences in risk sensitivity across the population.

This model allows for protected individuals to relax their usage of interventions, becoming unprotected in the process. Here, individuals in the protected class can relax back to the unprotected class through an infection-independent rate ( $\delta_i P_i$ ) that is governed by the intervention relaxation rate parameter ( $\delta_i$ ) for each tolerance level. In the limit of  $\delta_i = 0$ , an intervention is irreversible, which would represent an intervention such as vaccines with permanent immunity. When  $\delta_i$  is non-zero, individuals are using interventions such as masking or social distancing. This relaxation rate is motivated by factors such as psychological fatigue of social distancing [36, 37] and physical discomfort with wearing masks [38]. In general, we will consider the regime where the relaxation rate  $\delta$  is of comparable scale or smaller than the transmission scale (i.e.  $\delta \leq \beta$ ). This reflects intuition that people are likely to continue to protect themselves with interventions even beyond an initial outbreak [39].

For simplicity, we consider the model for the case when  $n = 1$  and  $n = 2$ . A schematic for these two cases is shown in Figure 1. However, the framework is general and can be extended to any discrete number of groups.

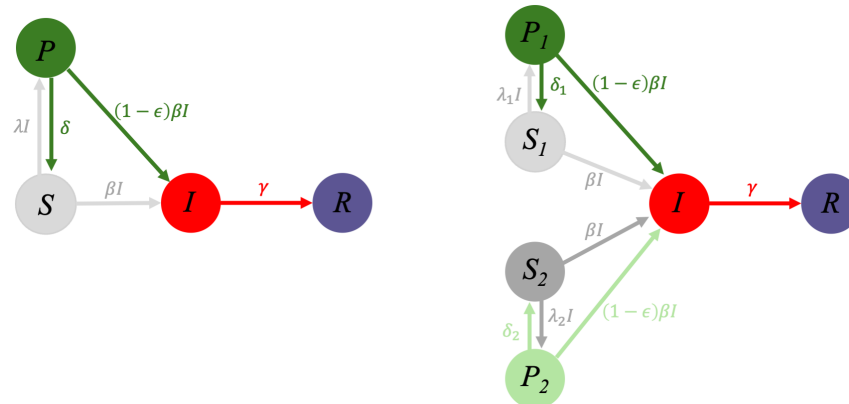

Figure 1: Flow diagram for an SIR model with adaptive interventions for either (a) a population with homogeneous risk tolerance or (b) a heterogeneous population with two different levels of risk tolerance. Susceptible individuals can access a more protected susceptible state through usage of interventions. The transition rate to the protected state depends on the incidence level. The protected state offers a  $1 - \epsilon$  reduction in transmission rate over the normal susceptible state.

For convention, when there are two susceptible classes, we assume the first susceptible class ( $S_1$ ) has a lower risk tolerance for becoming infected (i.e. more risk-averse). As a result, these individuals more readily adopt the intervention (i.e.  $\lambda_1 > \lambda_2$ ), making individuals in this class transition more rapidly to the protected susceptible state ( $P_1$ ). The second susceptible class ( $S_2$ ) is more risk tolerant (i.e. more risk-taking), and thus is less eager to use the intervention, making individuals in this class transition more slowly to their protected susceptible state ( $P_2$ ).

The model introduced here has several similarities and distinctions compared to existing behavior-disease models in the literature [19, 22, 28, 40–42], particularly to the global, prevalence-based spread of fear of disease of Perra et al. [43]. Our model shares the spirit of a disease contagion occurring at the same time as a social contagion. While the Perra model couches the social contagion in the language of individuals and fear, here we take the viewpoint that individuals have a personal characteristic called risk-tolerance, that encapsulates fear and other underlying biopsychosocial factors. The main feature of our model is the consideration of heterogeneity in the population, allowing for the population to be split into arbitrary factions of risk-tolerance. In addition, compared to the Perra model, the model here allows for people to remove protection at a rate independent of the disease.

### Adaptive Adoption of Interventions Can Produce Damped Oscillations

The coupling of intervention usage to the incidence rate and the resulting adaptive changes enables the epidemic dynamics to display a much richer set of behavior over the simple SIR model. From Figure 2, we see this particular set of conditions can deterministically produce multiple waves of infection, even when vital dynamics (i.e. birth and death processes) are not considered.

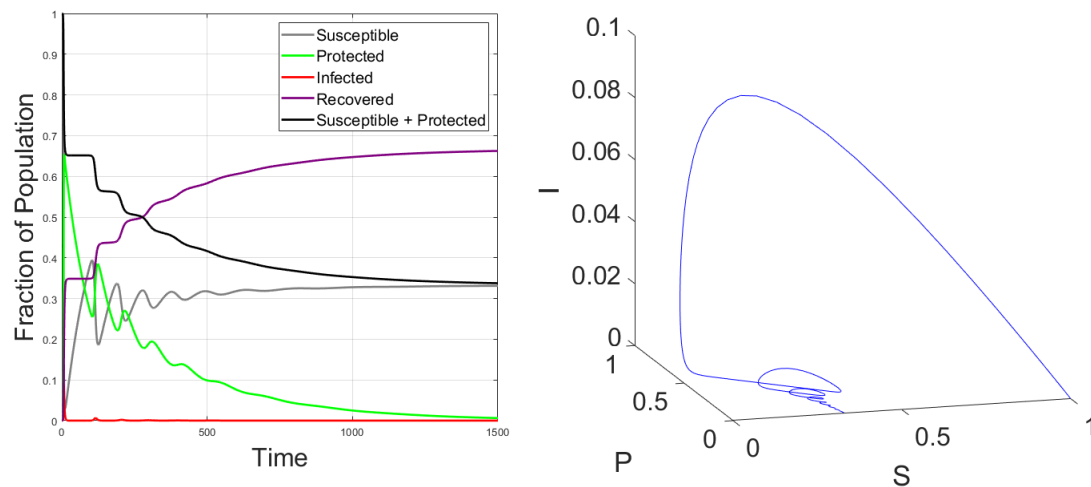

Figure 2: Time series for population with homogeneous risk tolerance and adaptive intervention usage and the corresponding phase space trajectory indicate the possibility for damped oscillations. Parameter values:  $\beta = 3, \gamma = 1, \epsilon = 0.8, \lambda = 10, \delta = 0.01$ . Initial conditions:  $I(0) = 10^{-6}, S(0) = 1 - I(0), P(0) = R(0) = 0$ .

Evidence for cycling of individuals between using interventions and not using interventions during the COVID pandemic can be seen in longitudinal usage [44–47] data. The possibility for these oscillations highlight the intimate connection between individual human behavior and intervention usage in shaping the dynamics of epidemics, while also be affected by the collective decision of everyone in the population. The coupling of behavior and epidemiology here provides a feedback mechanism where an increasing incidence rate prompts more individuals to adopt an intervention, which lowers the overall incidence rate; however, as the epidemic wanes and factors such as fatigue or discomfort set in, people begin dropping their usage of interventions, which may eventually lead to another wave of outbreaks if enough people become unprotected while infected individuals still remain, and then the cycle can be repeated. The oscillatory phenomenology here is reminiscent of several other behavioral models in the literature [48, 49].

### Protective Mechanisms Saturate in Underdamped Regime that Eliminates Epidemic Overshoot

One might have the intuition that having more people that will more readily adopt an intervention (i.e. mask, social distance, or vaccinate) or increasing the effectiveness of the intervention in reducing transmission will further decrease the size of the epidemic. Here we define epidemic size to be the cumulative number of infections over the course of the epidemic, or equivalently, the total depletion of susceptible people over the course of the epidemic. While we find this intuition to be mostly correct, we unexpectedly find that the protection conferred by either of these mechanisms can saturate once a critical parameter threshold has been passed.

In Figure 3, *left*, we see that increasing the effectiveness of the intervention or increasing the fraction of the population that are risk-averse monotonically decreases the epidemic size. However, in the dark blue region (which we will refer to as the underdamped regime) where both protection mechanisms are at their highest, we see no further

reduction in the epidemic size. This regime corresponds to an epidemic where the epidemic size exactly equals the herd immunity threshold, which is the minimum number of susceptibles that must be eliminated from the pool to prevent further outbreak from occurring. Since the epidemic size is the sum of the herd immunity threshold and the epidemic overshoot, this further implies that epidemic overshoot is eliminated in the underdamped regime.

The orbits of the dynamics from different areas of this parameter space are shown in Figure 3, *right*. We notice that orbits in the overdamped region (Orbits A, B, C) are parabolas and that each of those orbits ends at a different final number of susceptibles. In contrast, orbits in the underdamped regime (Orbits D, E, F) are qualitatively different in that they display long tails that converge to the same final number of susceptibles. We see that even though the final epidemic size is the same throughout the underdamped region, the trajectories to reach the same final epidemic size can look qualitatively different.

Figures S4-S5 show a larger sampling of trajectories if one fixes either the fraction of the population with low risk tolerance or the intervention effectiveness respectively. It becomes clear that at the border of the underdamped region, we can see a clear change in the qualitative behavior of the trajectories as the threshold is crossed. Under some assumptions, one can prove that that the epidemic overshoot is eliminated in the underdamped regime (Supplemental Information).

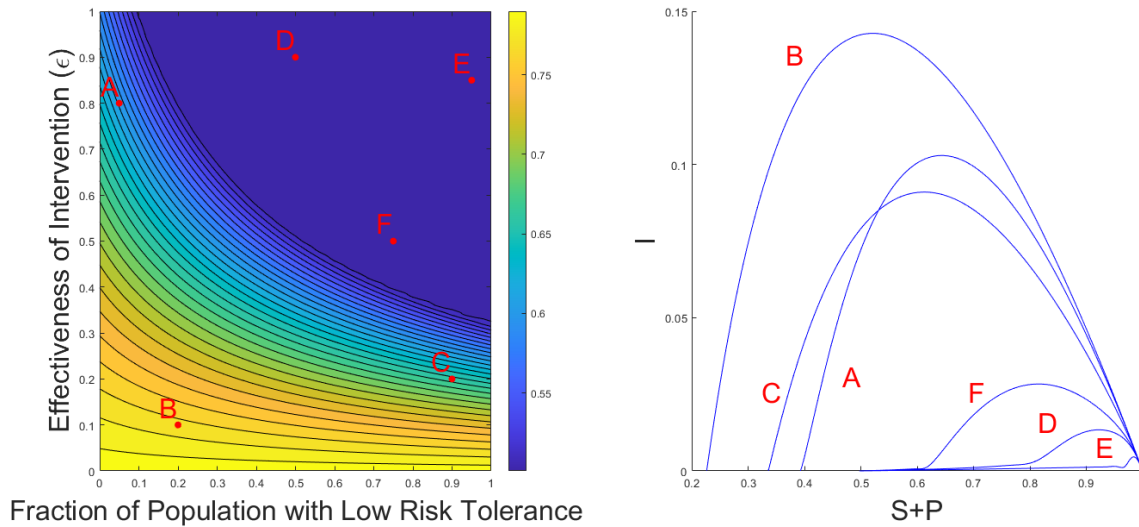

Figure 3: Left. Epidemic size as a function of varying the fraction of the population that are low-risk tolerance (i.e. those with higher  $\lambda$ ). Right. Corresponding orbits in the I versus S+P plane for the sampled points in parameter space. Parameter values:  $\beta = 2$ ,  $\gamma = 1$ ,  $\lambda_1 = 100$ ,  $\delta_1 = 0.1$ ,  $\lambda_2 = 1$ ,  $\delta_2 = 0.1$ . Initial conditions:  $I(0) = 10^{-8}$ ,  $P_1(0) = P_2(0) = R(0) = 0$ .

However, we should make the point that this is not evidence that highly effective interventions are a waste or that the overall population should tolerate risky behavior. As this is a model with a large parameter space, we cannot visualize all of it. If we could, we would find many parameter regimes where the protection mechanisms never reach a critical threshold, which implies the conventional intuition of increasing intervention effectiveness and having more risk-averse people always being beneficial applies.

### The Threshold to the Underdamped Regime is Reduced when Intervention Usage is Prolonged

The transition to the underdamped regime is more easily accessed when the usage of interventions is prolonged (or equivalently when the rate at which protected individuals relax back into the regular susceptibility classes decreases). Consider the following scenario which is identical to the previous setup, except now the intervention reversion rate ( $\delta P_i$ ) has been reduced by an order of magnitude (Figure 4). This corresponds to a scenario where people continue to use the intervention (i.e. such as wearing masks or social distancing) on a timescale significantly longer than the transmission timescale ( $\frac{1}{\delta} \gg \frac{1}{\beta}$ ).

This suggests that increasing the timescale at which individuals continue to use interventions decreases the number of risk-averse individuals needed to achieve the same epidemic size. This is reflected in the horizontal shift of the transition region to the left when comparing figures in the left column and the right column (Figure 4). We also briefly

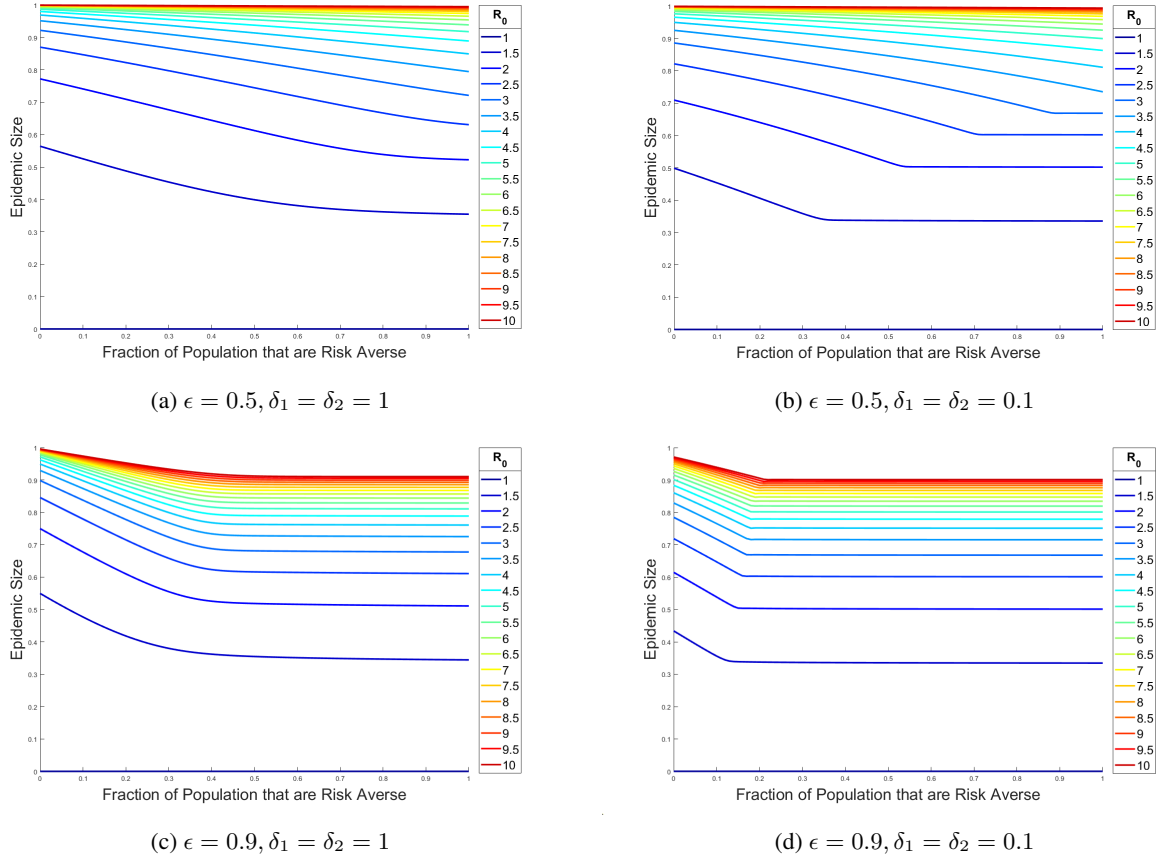

Figure 4: Final epidemic size versus fraction of population that are risk-averse ( $S_1$ ). Simulations in the left column have a higher  $\delta$  than simulations in the right column. Parameter values:  $R_0 = \beta, \gamma = 1, \lambda_1 = 100, \lambda_2 = 1$ . Initial conditions:  $I(0) = 10^{-8}, P_1(0) = P_2(0) = R(0) = 0$ .

investigate what happens if we allow for heterogeneous relaxation rates between the difference groups, which is more reflective of what occurs in reality, finding the epidemic size to be more attune to the slower relaxation time scale (Supplemental Information).

### Increasing Heterogeneity in Risk Tolerance can Either Increase or Decrease the Epidemic Size

There are many types of heterogeneity that may be present in the population, arising from differences in characteristics such as biological, cultural factors, and socioeconomic factors. The effect of each type of heterogeneity on disease dynamics is an area of active study. Some previous literature has suggested that increasing heterogeneity in the population through increasing the variation in their contact patterns, age, or general susceptibility results in a either a reduction or no change in the epidemic size [50–53].

We find in this model of heterogeneous behavior that it is possible to switch from a regime where increasing the heterogeneity in risk tolerance results in a decrease in epidemic size to a regime where increasing the heterogeneity in risk tolerance results in an increase in epidemic size. This result also does not have to necessarily be due to a dramatic shift in parameters. From Figure 5, we see this shift can arise from solely varying the fraction of the population with low risk tolerance by a small amount.

The intuition underlying this result is that when the average adoption rate ( $\lambda_{average}$ ), which is expressed as a (geometric or arithmetic) weighted mean of the adoption rates of the two groups, is fixed at a constant level, then the epidemic size can be suppressed through either varying the fraction of the population in each group or through varying each group’s adoption rate. When risk-averse people make up a smaller fraction of the population than risk-taking people, then it would be more beneficial in reducing epidemic size to have the adoption rates of the two groups be more similar (i.e. more homogeneous) as that would imply risk-taking people (which are then the majority of the

It is made available under a [CC-BY-NC-ND 4.0 International license](https://creativecommons.org/licenses/by-nc-nd/4.0/).

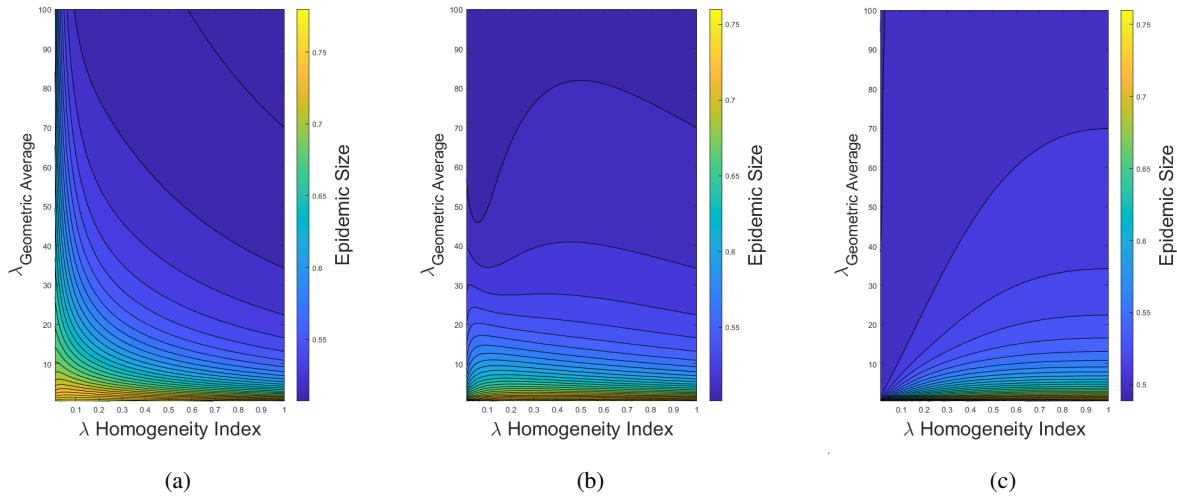

Figure 5: Epidemic size under differing levels of heterogeneity in the adoption rate for interventions. The mean adoption rate of the two groups (i.e. geometric average of  $\lambda_1, \lambda_2$ ) is compared to the difference in the two adoption rates as parameterized by a homogeneity index (see Methods for definition). *Left* is when the fraction of the population with low risk tolerance ( $x_1$ ) is 0.2, *center* is when  $x_1 = 0.35$ , *right* is when  $x_1 = 0.5$ . Parameter values:  $\beta = 2, \gamma = 1, \epsilon = 0.7, \delta_1 = \delta_2 = 0.5$ . Initial conditions:  $I(0) = 10^{-8}, P_1(0) = P_2(0) = R(0) = 0$ .

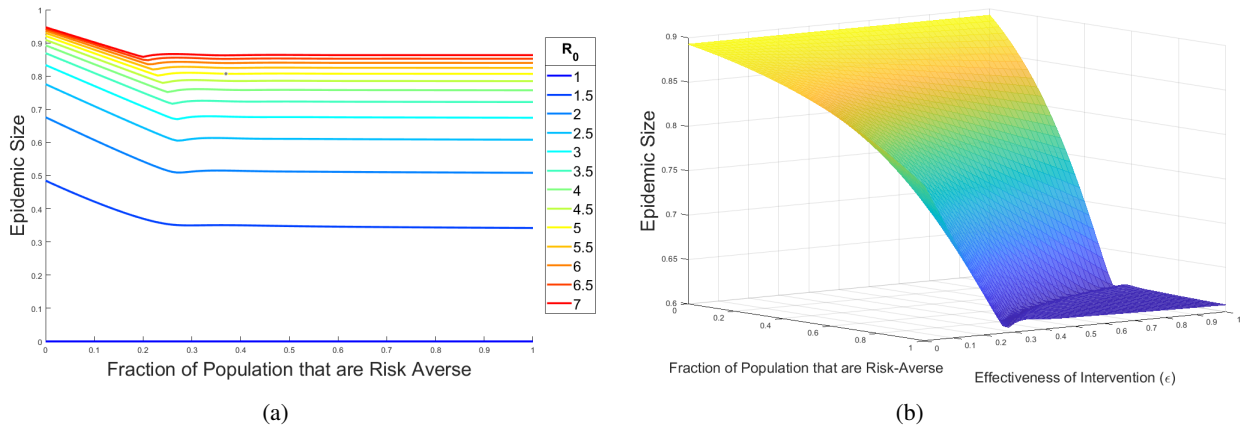

Figure 6: (a) Final epidemic size as a function of the proportion of the population that are risk averse ( $S_1$ ). Parameter values:  $\lambda_1 = 10, \lambda_2 = 0.5, \epsilon = 1, \delta_1 = \delta_2 = 0.1$ . Initial conditions:  $I(0) = 10^{-7}, P_1(0) = P_2(0) = 0, R(0) = 0$ . (b) Same as in (a) except now the effectiveness of the intervention ( $\epsilon$ ) is allowed to vary.

population) would have a similar adoption rate to risk-averse people. As an increasingly larger fraction of the population is composed of risk-averse people, then it becomes increasingly beneficial in reducing epidemic size to have the adoption rates of the two groups be more different (i.e. more heterogeneous) as the deleterious effects of highly risk-taking people (which are then the minority of the population) can be mitigated by the large presence of risk-averse people.

### Epidemic Size Does Not Necessarily Decrease with an Increasing Number of Risk-Averse People

General intuition would suggest that as one increases the number of risk-averse people in the population that the overall epidemic size would go down. However, the introduction of the adaptive behavior mechanism allows for regimes where this is no longer strictly the case. Thus, it is no longer a guarantee that decreasing the population's overall risk tolerance will always improve epidemic outcomes.

Consider Figure 6a, where we find a small region after the transition to the underdamped regime where there is an increase in the epidemic size when increasing the fraction of the population that are risk-averse.

If we also vary the effectiveness of the intervention as an additional axis (Figure 6b), we observe that there is a small trench in the threshold region surrounding the plateau area. This double descent suggests that the landscape can potentially be quite complicated when risk tolerance in the population is partitioned into even more groups. While the mechanism and intuition underlying this double descent remains to be determined, it is possible that it is caused by peculiar transient dynamics that are occurring at the beginning of outbreaks in that parameter regime [54].

### 3 Discussion and Conclusions

In this paper, we have proposed a simple model to model heterogeneity in risk tolerance levels in the population. We find that including a behavioral mechanism for adopting interventions that adapts with the level of infections greatly expands the variety in epidemic dynamics and outcomes that can occur.

The general picture from the findings suggest that epidemic dynamics under adaptive intervention adoption fall into either an underdamped regime or an overdamped regime. The underdamped regime has a special property in which the epidemic size equals the herd immunity threshold exactly, which means no epidemic overshoot occurs. The system can be driven into this regime when protection mechanisms (such as numbers of risk-averse people, intervention effectiveness, and duration of intervention usage) are increased to a sufficiently high level. This regime is also marked by damped oscillations in the phase space of infecteds and susceptibles. In direct contrast, the overdamped regime closely resembles the dynamics of a simple *SIR* model without behavior, in which there are no oscillations and a non-zero overshoot, which makes the epidemic size greater than the herd immunity threshold. While we have limited our numerical exploration of the model to two groups of different risk-tolerance levels, in principle our framework can accommodate an arbitrary number of risk-tolerance groups. While the combinatorial increase in parameter space make it difficult to thoroughly explore larger models, we might naively expect there to be a complex landscape of outcomes, which might reveal other counter-intuitive phenomenology akin to the non-monotonic dependence of epidemic size with increasing number of risk-averse people for two groups.

We have looked for some evidence in the historical data on outbreaks for these damped oscillations due to cycles in adoption and relaxation of interventions. While such data is in very limited supply, previous analysis suggested that relaxation of social distancing measures may have led to multiple waves of infection in the Spanish flu of the early 20th century [55, 56]. Dating back to the time of the bubonic plague, there is data from an outbreak in 1636 in the parish of St. Martin in the Fields, which showed how relaxation of quarantining and isolation measures lead to a smaller secondary wave of infections [57]. More recently, premature relaxation of interventions during the COVID pandemic might have led to secondary outbreaks [58]. The complex milieu of disease, biological, behavioral, political, economic, and cultural factors however make it difficult to isolate cause-and-effect in real-world epidemics [59].

The results here are reminiscent of feedback control systems commonly studied in control theory. Here the set point is the herd immunity threshold, which is determined by the basic reproduction number ( $R_0$ ). The ability for the population to reach this set point for epidemic size without additional overshoot depends on the effectiveness of the feedback mechanism from coupling intervention usage to the number of infected people. In the model presented, the adoption of interventions is a continuous process, in which the different groups are constantly reacting to the level of infections without requiring any notion of time or thresholds. In contrast, existing research on mitigation have considered more active control where activation and intervention timing play a key role [60–62]. Future work may explore how to synergistically utilize both active and continuous mechanisms for control.

The inclusion of heterogeneity in risk tolerance and adaptive adoption of interventions leads to several unexpected conclusions. We find that increasing heterogeneity in risk tolerance levels in the population can lead to either an increase or decrease in the epidemic size. The direction of the trend depends nonlinearly on the composition of the population in terms of the ratio of risk-averse to risk-taking individuals and their respective intervention adoption rates. This adds to a small literature that demonstrates how heterogeneity can actually lead to a larger epidemic [27, 63].

Interestingly, these results on heterogeneity also can be used to address the question of whether distributed or centralized control of mitigation results in a smaller outbreak. Control of factors such as mobility may be more practically achieved in a more centralized and unified fashion [64, 65], whereas a distributed approach may be more appropriate when considering factors such as speed and individual agency. In a centralized scenario, a single entity controls the dynamics. That situation has an exact correspondence to the homogeneous population considered here, where all individuals respond in unison. Distributed control allows for more localized control, such as individuals or small groups deciding if they want to mask or social distance. This corresponds to the heterogeneous scenarios considered here, where there are multiple groups each with differing risk tolerance level. The results suggest that in some scenarios a single, coordinated response would be better for mitigation, whereas in other parameter regimes, a more decentralized strategy would be more optimal.



We also find that increasing overall protection mechanisms does not always result in a monotonic decrease in epidemic size. In scenarios when the adoption rate begins to approach the transmission rate, near the critically damped boundary a nonmonotonicity can arise. This suggests that when intervention usage and effectiveness are tenuous, the dynamics become more complex and predicting what epidemic outcomes will result becomes significantly more difficult. Understanding how these nonlinear effects combine with other biological and behavioral heterogeneities will be important to explore in future work.

## 4 Methods

### Defining the $\lambda$ Homogeneity Index

The  $\lambda$  homogeneity index is defined as follows. We will assume the initial condition that at the beginning of the dynamics, the total population is composed of the fraction of the population in the low risk tolerance group  $x_1$ , the high risk tolerance group  $x_2$ , or the infected class. We will assume the fraction of the population initially infected is sufficiently small so that size of the two susceptible compartments is given by  $x_1$  and  $1 - x_1$  respectively.

Define a homogeneity index parameter ( $c$ ) that captures the degree of homogeneity between the two adoption rates,  $\lambda_1$  and  $\lambda_2$ . We define the parameter domain to be the unit interval,  $c \in (0, 1]$ . An index value of  $c = 1$  indicates  $\lambda_1 = \lambda_2$ , while decreasing the index value towards 0 increases the difference between  $\lambda_1$  and  $\lambda_2$ .

We can define the average adoption rate as being either a geometric or arithmetic mean of the two adoption rates. The choice one makes is arbitrary, so we present prescriptions for both routes. In both cases, we will map the level of homogeneity to the unit interval.

### Geometric Average

Let the geometric average of the two adoption rates be given by  $\lambda_{\text{Geometric Average}}$ .

$$\lambda_{\text{Geometric Average}} = \lambda_1^{x_1} \lambda_2^{1-x_1} \quad (5)$$

Define  $\lambda_2$  as a fraction between 0 and 1 of the average  $\lambda$ .

$$\lambda_2 = c \lambda_{\text{Geometric Average}}, c \in (0, 1] \quad (6)$$

These two equations combine to define  $\lambda_1$ .

$$\lambda_1 = \frac{\lambda_{\text{Geometric Average}}}{c^{\frac{x_1}{1-x_1}}}, c \in (0, 1] \quad (7)$$

### Arithmetic Average

Let the arithmetic average of the two adoption rates be given by  $\lambda_{\text{Arithmetic Average}}$ .

$$\lambda_{\text{Arithmetic Average}} = x_1 \lambda_1 + (1 - x_1) \lambda_2 \quad (8)$$

Define  $\lambda_2$  as a fraction between 0 and 1 of the average  $\lambda$ .

$$\lambda_2 = c \lambda_{\text{Arithmetic Average}}, c \in (0, 1] \quad (9)$$

These two equations combine to define  $\lambda_1$ .

$$\lambda_1 = \frac{\lambda_{\text{Arithmetic Average}}(1 - x_1 c)}{1 - x_1}, c \in (0, 1] \quad (10)$$

Again, an index value of 1 indicates  $\lambda_1 = \lambda_2$ , while decreasing the index value towards 0 increases the difference between  $\lambda_1$  and  $\lambda_2$ .

### Homogeneity Index in Larger Groups

The above parameterization of homogeneity is useful for in the setting of a two-group model because the entirety of the possible difference in heterogeneity between  $\lambda_1$  and  $\lambda_2$  can be mapped to the unit interval. This allows us to more easily see the qualitative shift in trend in phenomenology that prompted this section of text in the first place. An alternative parameterization might have used the variance between the two adoption rates. However, the domain of such a parameterization is unbounded, making it impossible to explore fully numerically. Moving beyond two groups would necessitate a different parameterization (such as through using a variance or coefficient-of-variation approach).

### **Author Contributions**

M.M.N., B.E.C., C.M.S.-R., B.T.G., and S.A.L. designed the study. M.M.N., A.S.F., M.A.C. performed the simulations and calculations. M.M.N. wrote the manuscript. All authors contributed to interpreting the results and editing the manuscript.

### **Acknowledgments**

The ideas and conversations that sparked this work originated during a special session on the Mathematics of Infectious Diseases: A Session in Memory of Dr. Abdul-Aziz Yakubu, III at the 2024 Spring Sectional Meeting of the American Mathematical Society. The authors would like to thank the organizers of that session: Abba Gumel, Daniel Cooney, and Chadi Saad-Roy.

### **Data Availability**

The code used to generate all figures is provided in the Supplemental Material.

### **Funding**

M.M.N., A.S.F., M.A.C., and S.A.L. would like to acknowledge funding from NSF (CCF1917819, CNS-2041952, DMS-2327711), Army Research Office (W911NF-18-1-0325), and a gift from William H. Miller III. C.M.S.-R. acknowledges funding from the Miller Institute for Basic Research in Science of UC Berkeley via a Miller Research Fellowship. B.E.C. would like to acknowledge funding from NSF (IHBEM grant 2327710 and Expeditions NSF 1918656). B.T.G. would like to acknowledge the Princeton Catalysis Initiative and Princeton Precision Medicine.

### **Competing Interests**

The authors declare no competing interests.

## References

1. Maxmen, A. & Mallapaty, S. The COVID lab-leak hypothesis: what scientists do and don't know. *Nature* **594**, 313–315 (2021).
2. Betsch, C. *et al.* Social and behavioral consequences of mask policies during the COVID-19 pandemic. *Proceedings of the National Academy of Sciences* **117**, 21851–21853 (2020).
3. Fischer, C. B. *et al.* Mask adherence and rate of COVID-19 across the United States. *PLOS ONE* **16**, e0249891 (2021).
4. Yang, L. *et al.* Sociocultural determinants of global mask-wearing behavior. *Proceedings of the National Academy of Sciences* **119**, e2213525119 (2022).
5. Morens, D. M., Folkers, G. K. & Fauci, A. S. The Concept of Classical Herd Immunity May Not Apply to COVID-19. *The Journal of Infectious Diseases* **226**, 195–198 (2022).
6. Wong, C. M. L. & Jensen, O. The paradox of trust: perceived risk and public compliance during the COVID-19 pandemic in Singapore. *Journal of Risk Research* **23**, 1021–1030 (2020).
7. Brzezinski, A., Kecht, V., Van Dijke, D. & Wright, A. L. Science skepticism reduced compliance with COVID-19 shelter-in-place policies in the United States. *Nature Human Behaviour* **5**, 1519–1527 (2021).
8. Kleitman, S. *et al.* To comply or not comply? A latent profile analysis of behaviours and attitudes during the COVID-19 pandemic. *PLOS ONE* **16**, e0255268 (2021).
9. Machingaidze, S. & Wiysonge, C. S. Understanding COVID-19 vaccine hesitancy. *Nature Medicine* **27**, 1338–1339 (2021).
10. Fedele, F. *et al.* COVID-19 vaccine hesitancy: a survey in a population highly compliant to common vaccinations. *Human Vaccines & Immunotherapeutics* **17**, 3348–3354 (2021).
11. Gallotti, R., Valle, F., Castaldo, N., Sacco, P. & De Domenico, M. Assessing the risks of 'infodemics' in response to COVID-19 epidemics. *Nature Human Behaviour* **4**, 1285–1293 (2020).
12. Loomba, S., de Figueiredo, A., Piatek, S. J., de Graaf, K. & Larson, H. J. Measuring the impact of COVID-19 vaccine misinformation on vaccination intent in the UK and USA. *Nature Human Behaviour* **5**, 337–348 (2021).
13. Offer-Westort, M., Rosenzweig, L. R. & Athey, S. Battling the coronavirus 'infodemic' among social media users in Kenya and Nigeria. *Nature Human Behaviour*, 1–12 (2024).
14. Towers, S. *et al.* Mass Media and the Contagion of Fear: The Case of Ebola in America. *PLOS ONE* **10**, e0129179 (2015).
15. Murray, D. R. & Schaller, M. in *Advances in Experimental Social Psychology* (eds Olson, J. M. & Zanna, M. P.) 75–129 (Academic Press, 2016).
16. Kramer, P. & Bressan, P. Infection threat shapes our social instincts. *Behavioral Ecology and Sociobiology* **75**, 47 (2021).
17. Lu, J. G., Jin, P. & English, A. S. Collectivism predicts mask use during COVID-19. *Proceedings of the National Academy of Sciences* **118**, e2021793118 (2021).
18. Bansal, S., Grenfell, B. T. & Meyers, L. A. When individual behaviour matters: homogeneous and network models in epidemiology. *Journal of The Royal Society Interface* **4**, 879–891 (2007).
19. Funk, S., Salathé, M. & Jansen, V. A. A. Modelling the influence of human behaviour on the spread of infectious diseases: a review. *Journal of The Royal Society Interface* **7**, 1247–1256 (2010).
20. Fenichel, E. P. *et al.* Adaptive human behavior in epidemiological models. *Proceedings of the National Academy of Sciences* **108**, 6306–6311 (2011).
21. Edmunds, W. J., Medley, G. F. & Nokes, D. J. Evaluating the cost-effectiveness of vaccination programmes: a dynamic perspective. *Statistics in Medicine* **18**, 3263–3282 (1999).
22. Weitz, J. S., Park, S. W., Eksin, C. & Dushoff, J. Awareness-driven behavior changes can shift the shape of epidemics away from peaks and toward plateaus, shoulders, and oscillations. *Proceedings of the National Academy of Sciences* **117**, 32764–32771 (2020).
23. Wagner, C. E. *et al.* Economic and Behavioral Influencers of Vaccination and Antimicrobial Use. *Frontiers in Public Health* **8** (2020).
24. Tyson, R. C., Hamilton, S. D., Lo, A. S., Baumgaertner, B. O. & Krone, S. M. The Timing and Nature of Behavioural Responses Affect the Course of an Epidemic. *Bulletin of Mathematical Biology* **82**, 14 (2020).
25. Espinoza, B., Marathe, M., Swarup, S. & Thakur, M. Asymptomatic individuals can increase the final epidemic size under adaptive human behavior. *Scientific Reports* **11**, 19744 (2021).
26. Wagner, C. E., Saad-Roy, C. M. & Grenfell, B. T. Modelling vaccination strategies for COVID-19. *Nature Reviews Immunology* **22**, 139–141 (2022).

27. Espinoza, B., Swarup, S., Barrett, C. L. & Marathe, M. Heterogeneous adaptive behavioral responses may increase epidemic burden. *Scientific Reports* **12**, 11276 (2022).
28. Qiu, Z. *et al.* Understanding the coevolution of mask wearing and epidemics: A network perspective. *Proceedings of the National Academy of Sciences* **119**, e2123355119 (2022).
29. Traulsen, A., Levin, S. A. & Saad-Roy, C. M. Individual costs and societal benefits of interventions during the COVID-19 pandemic. *Proceedings of the National Academy of Sciences* **120**, e2303546120 (2023).
30. Saad-Roy, C. M. & Traulsen, A. Dynamics in a behavioral–epidemiological model for individual adherence to a nonpharmaceutical intervention. *Proceedings of the National Academy of Sciences* **120**, e2311584120 (2023).
31. Smith, R. A. *et al.* COVID-19 Mitigation Among College Students: Social Influences, Behavioral Spillover, and Antibody Results. *Health Communication* **38**, 2002–2011 (2023).
32. Kiss, I. Z., Miller, J. C. & Simon, P. L. *Mathematics of Epidemics on Networks: From Exact to Approximate Models* (Springer International Publishing, Cham, 2017).
33. Morse, S. S. *et al.* Prediction and prevention of the next pandemic zoonosis. *The Lancet* **380**, 1956–1965 (2012).
34. Osterholm, M. T. in *The Covid-19 Reader* (Routledge, 2020).
35. Bergstrom, C. T. & Hanage, W. P. Human behavior and disease dynamics. *Proceedings of the National Academy of Sciences* **121**, e2317211120 (2024).
36. Franzen, A. & Wöhner, F. Fatigue during the COVID-19 pandemic: Evidence of social distancing adherence from a panel study of young adults in Switzerland. *PLOS ONE* **16**, e0261276 (2021).
37. Jørgensen, F., Bor, A., Rasmussen, M. S., Lindholt, M. F. & Petersen, M. B. Pandemic fatigue fueled political discontent during the COVID-19 pandemic. *Proceedings of the National Academy of Sciences* **119**, e2201266119 (2022).
38. Cheok, G. J. W. *et al.* Appropriate attitude promotes mask wearing in spite of a significant experience of varying discomfort. *Infection, Disease & Health* **26**, 145–151 (2021).
39. Barak, D., Gallo, E., Rong, K., Tang, K. & Du, W. Experience of the COVID-19 pandemic in Wuhan leads to a lasting increase in social distancing. *Scientific Reports* **12**, 18457 (2022).
40. Funk, S. *et al.* Nine challenges in incorporating the dynamics of behaviour in infectious diseases models. *Epidemics. Challenges in Modelling Infectious Disease Dynamics* **10**, 21–25 (2015).
41. Wang, Z., Andrews, M. A., Wu, Z.-X., Wang, L. & Bauch, C. T. Coupled disease–behavior dynamics on complex networks: A review. *Physics of Life Reviews* **15**, 1–29 (2015).
42. Verelst, F., Willem, L. & Beutels, P. Behavioural change models for infectious disease transmission: a systematic review (2010–2015). *Journal of The Royal Society Interface* **13**, 20160820 (2016).
43. Perra, N., Balcan, D., Gonçalves, B. & Vespignani, A. Towards a Characterization of Behavior-Disease Models. *PLOS ONE* **6**, e23084 (2011).
44. Mathieu, E. *et al.* Coronavirus Pandemic (COVID-19). *Our World in Data* (2020).
45. Hale, T. *et al.* A global panel database of pandemic policies (Oxford COVID-19 Government Response Tracker). *Nature Human Behaviour* **5**, 529–538 (2021).
46. Rader, B. *et al.* Mask-wearing and control of SARS-CoV-2 transmission in the USA: a cross-sectional study. *The Lancet Digital Health* **3**, e148–e157 (2021).
47. Salomon, J. A. *et al.* The US COVID-19 Trends and Impact Survey: Continuous real-time measurement of COVID-19 symptoms, risks, protective behaviors, testing, and vaccination. *Proceedings of the National Academy of Sciences* **118**, e2111454118 (2021).
48. Liu, M., Liz, E. & Röst, G. Endemic Bubbles Generated by Delayed Behavioral Response: Global Stability and Bifurcation Switches in an SIS Model. *SIAM Journal on Applied Mathematics* **75**, 75–91 (2015).
49. Manrubia, S. & Zanette, D. H. Individual risk-aversion responses tune epidemics to critical transmissibility ( $R = 1$ ). *Royal Society Open Science* **9**, 211667 (2022).
50. Miller, J. C. Epidemic size and probability in populations with heterogeneous infectivity and susceptibility. *Physical Review E* **76**, 010101 (2007).
51. Britton, T., Ball, F. & Trapman, P. A mathematical model reveals the influence of population heterogeneity on herd immunity to SARS-CoV-2. *Science* **369**, 846–849 (2020).
52. Gomes, M. G. M. *et al.* Individual variation in susceptibility or exposure to SARS-CoV-2 lowers the herd immunity threshold. *Journal of Theoretical Biology* **540**, 111063 (2022).
53. Allard, A., Moore, C., Scarpino, S. V., Althouse, B. M. & Hébert-Dufresne, L. The Role of Directionality, Heterogeneity, and Correlations in Epidemic Risk and Spread. *SIAM Review* **65**, 471–492 (2023).
54. Hastings, A. *et al.* Transient phenomena in ecology. *Science* **361**, eaat6412 (2018).

55. Hatchett, R. J., Mecher, C. E. & Lipsitch, M. Public health interventions and epidemic intensity during the 1918 influenza pandemic. *Proceedings of the National Academy of Sciences* **104**, 7582–7587 (2007).
56. Caley, P., Philp, D. J. & McCracken, K. Quantifying social distancing arising from pandemic influenza. *Journal of The Royal Society Interface* **5**, 631–639 (2007).
57. Newman, K. L. S. Shutt Up: Bubonic Plague and Quarantine in Early Modern England. *Journal of Social History* **45**, 809–834 (2012).
58. Tsai, A. C., Harling, G., Reynolds, Z., Gilbert, R. F. & Siedner, M. J. Coronavirus Disease 2019 (COVID-19) Transmission in the United States Before Versus After Relaxation of Statewide Social Distancing Measures. *Clinical Infectious Diseases* **73**, S120–S126 (Supplement\_2 2021).
59. Caulkins, J. P. *et al.* The optimal lockdown intensity for COVID-19. *Journal of Mathematical Economics. The economics of epidemics and emerging diseases* **93**, 102489 (2021).
60. Bussell, E. H., Dangerfield, C. E., Gilligan, C. A. & Cunniffe, N. J. Applying optimal control theory to complex epidemiological models to inform real-world disease management. *Philosophical Transactions of the Royal Society B: Biological Sciences* **374**, 20180284 (2019).
61. Lauro, F. D., Kiss, I. Z. & Miller, J. C. Optimal timing of one-shot interventions for epidemic control. *PLOS Computational Biology* **17**, e1008763 (2021).
62. Morris, D. H., Rossine, F. W., Plotkin, J. B. & Levin, S. A. Optimal, near-optimal, and robust epidemic control. *Communications Physics* **4**, 1–8 (2021).
63. Volz, E. M., Miller, J. C., Galvani, A. & Meyers, L. A. Effects of Heterogeneous and Clustered Contact Patterns on Infectious Disease Dynamics. *PLOS Computational Biology* **7**, e1002042 (2011).
64. Bonaccorsi, G. *et al.* Economic and social consequences of human mobility restrictions under COVID-19. *Proceedings of the National Academy of Sciences* **117**, 15530–15535 (2020).
65. Espinoza, B., Castillo-Chavez, C. & Perrings, C. Mobility restrictions for the control of epidemics: When do they work? *PLOS ONE* **15**, e0235731 (2020).

## Supplemental Material: The complex interplay between risk tolerance and the spread of infectious diseases

### Analysis of the Model When Individuals Respond to the Incidence Rate

The rate at which intervention adoption occurs may be driven by individuals considering information such as the epidemic incidence rate (e.g. cases per day), the total number of infected individuals in the population (e.g. total number of active cases), and mortality rate (e.g. deaths per day) [22]. Here we will consider the first case, where individuals adopt interventions based on the incidence rate for infections. Recall that the incidence rate is given by  $\sum_{i=1}^n (\beta S_i I + (1 - \epsilon)\beta P_i I)$ . Parameterizing each person's individual risk tolerance by  $\lambda_i$ , let us assume each individual adopts an intervention at rate  $\lambda_i \sum_{i=1}^n (\beta S_i I + (1 - \epsilon)\beta P_i I)$ . Then, if there are  $S_i$  number of people that behave exactly the same (i.e. have the same level of risk-aversion), then at the population scale there is a collective adoption rate of  $\lambda_i S_i \sum_{i=1}^n (\beta S_i I + (1 - \epsilon)\beta P_i I)$ . The same reasoning holds for each of the  $n$  tolerance levels. The corresponding equations for this model are given by (11-14).

$$\frac{dS_i}{dt} = -\beta S_i I - \lambda_i S_i \sum_{i=1}^n (\beta S_i I + (1 - \epsilon)\beta P_i I) + \delta_i P_i \quad (11)$$

$$\frac{dP_i}{dt} = -(1 - \epsilon)\beta P_i I - \delta_i P_i + \lambda_i S_i \sum_{i=1}^n (\beta S_i I + (1 - \epsilon)\beta P_i I) \quad (12)$$

$$\frac{dI}{dt} = -\gamma I + \sum_{i=1}^n (\beta S_i I + (1 - \epsilon)\beta P_i I) \quad (13)$$

$$\frac{dR}{dt} = \gamma I \quad (14)$$

When comparing the final epidemic size and epidemic trajectories between this model and the model in the main text where individuals adopt interventions at a rate that is based on the total number of infected people (Figures S4-S5), the results are indistinguishable (Figures S1-S2).

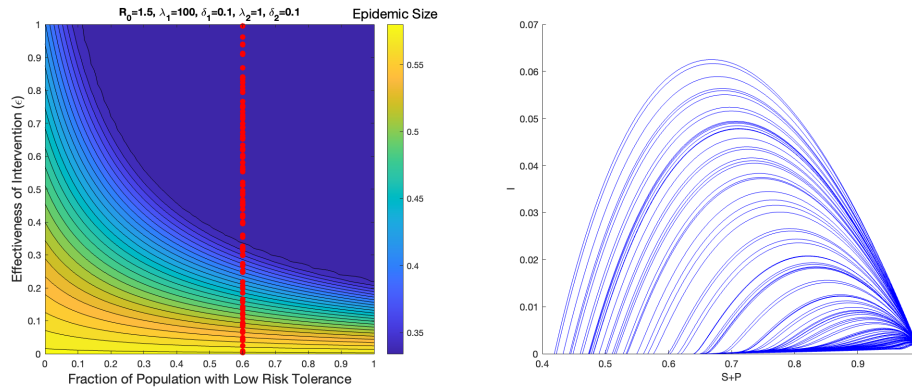

Figure S1: Left. Epidemic size as a function of varying the fraction of the population that are low-risk tolerance (i.e. those with higher  $\lambda$ ) when individuals react to incidence rate. Right. Corresponding orbits in the  $I$  versus  $S+P$  plane for the sampled points in parameter space when the fraction of the population that are low-risk tolerance has been fixed. Parameter values:  $\beta = 1.5, \gamma = 1, \lambda_1 = 100, \delta_1 = 0.1, \lambda_2 = 1, \delta_2 = 0.1$ . Initial conditions:  $I(0) = 10^{-8}, P_1(0) = P_2(0) = R(0) = 0$ .

Thus, given the equivalence in results, we have gone with the mathematically simpler and cleaner model based on total number of infected people in the main text.

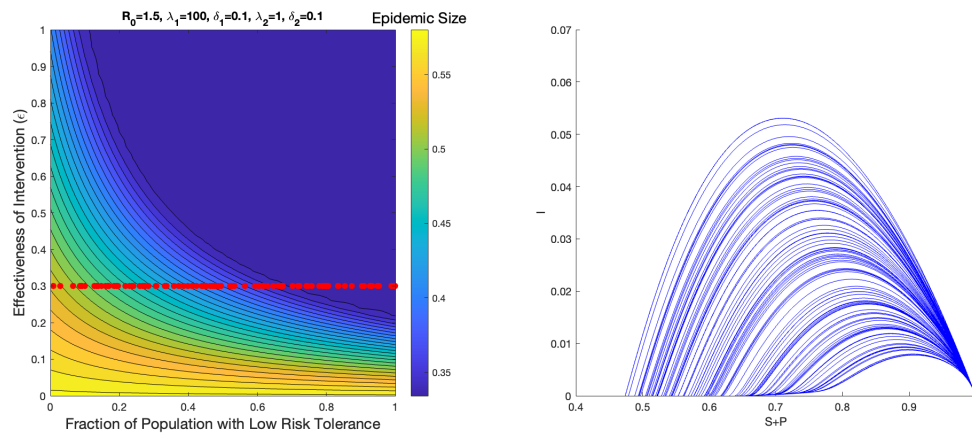

Figure S2: Left. Epidemic size as a function of varying the fraction of the population that are low-risk tolerance (i.e. those with higher  $\lambda$ ) when individuals react to incidence rate. Right. Corresponding orbits in the I versus S+P plane for the sampled points in parameter space when the intervention effectiveness has been fixed. Parameter values:  $\beta = 1.5, \gamma = 1, \lambda_1 = 100, \delta_1 = 0.1, \lambda_2 = 1, \delta_2 = 0.1$ . Initial conditions:  $I(0) = 10^{-8}, P_1(0) = P_2(0) = R(0) = 0$ .

### **The Herd Immunity Threshold is Set by a Complex Interplay Between Transmission ( $R_0$ ), Behavior, and Intervention Effectiveness ( $\epsilon$ ).**

While we could make some analytical calculations for the epidemic size in the homogeneous model, the heterogeneous two group case requires a numerical approach to find the plateau region. In general, it is set by a highly nonlinear interaction between the transmission ( $R_0$ ), behavior as determined by the fraction of the population that are risk-averse and risk-taking, and the effectiveness of the intervention ( $\epsilon$ ).

Consider the following progression of figures (Figure S3), where in each subsequent figure, the effectiveness of the intervention in blocking transmission ( $\epsilon$ ) is increasing.



It is made available under a [CC-BY-NC-ND 4.0 International license](https://creativecommons.org/licenses/by-nc-nd/4.0/).

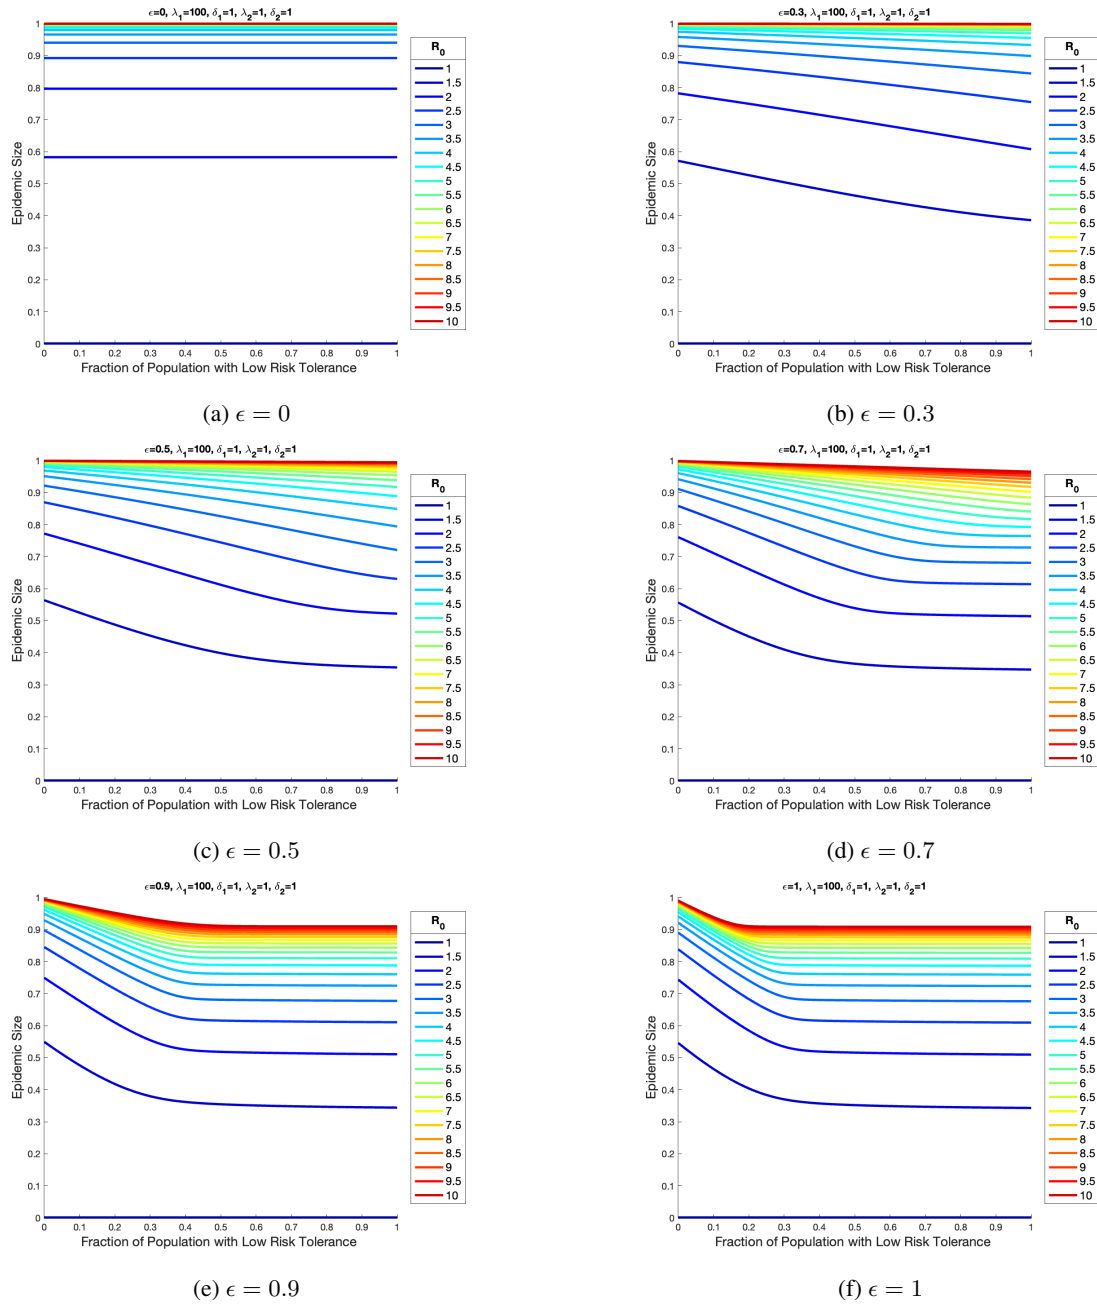

Figure S3: Final epidemic size versus fraction of population that are risk-averse ( $S_1$ ) with a progressive increase in intervention effectiveness ( $\epsilon$ ). Parameter values:  $\lambda_1 = 100, \delta_1 = 1, \lambda_2 = 1, \delta_2 = 1$ . Initial conditions:  $I(0) = 10^{-7}, P_1(0) = P_2(0) = 0, R(0) = 0$ .

## Comparing Orbits Inside and Outside of the Plateau Region of Herd Immunity

The following figures sample more orbits for the Figure considered in the main text.

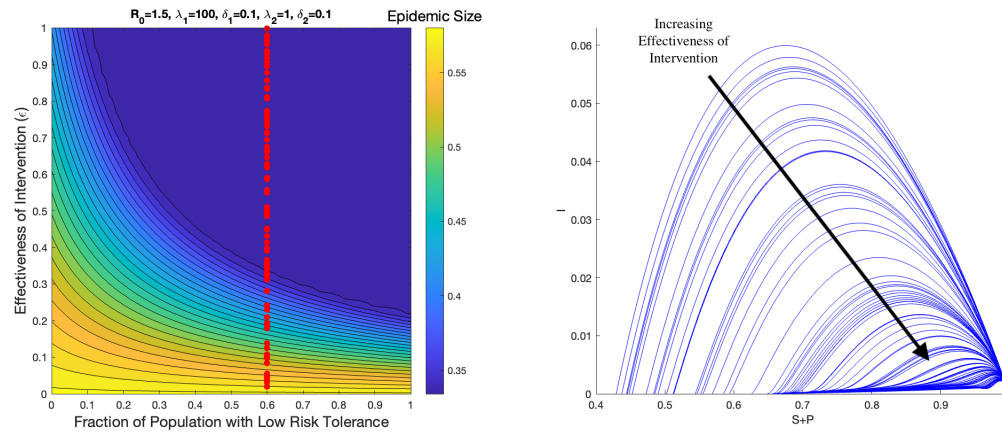

Figure S4: Left. Epidemic size as a function of varying the fraction of the population that are low-risk tolerance (i.e. those with higher  $\lambda$ ). Right. Corresponding orbits in the I versus S+P plane for the sampled points in parameter space when the fraction of the population that are low-risk tolerance has been fixed. Parameter values:  $\beta = 1.5, \gamma = 1, \lambda_1 = 100, \delta_1 = 0.1, \lambda_2 = 1, \delta_2 = 0.1$ . Initial conditions:  $I(0) = 10^{-8}, P_1(0) = P_2(0) = R(0) = 0$ .

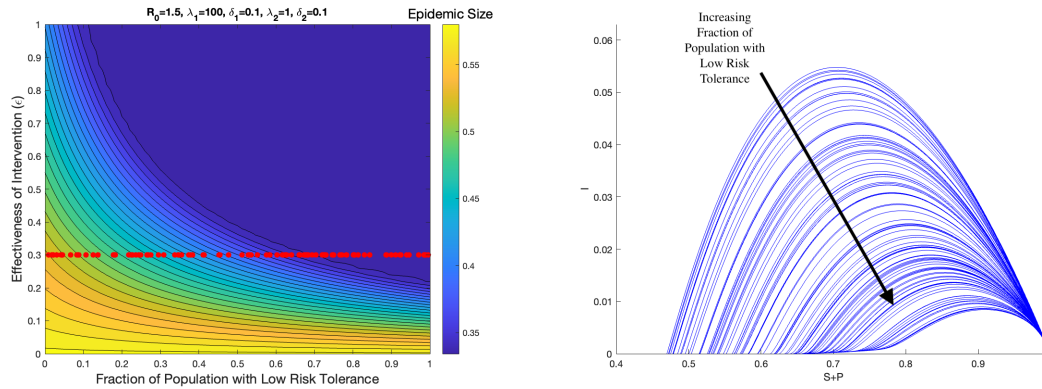

Figure S5: Left. Epidemic size as a function of varying the fraction of the population that are low-risk tolerance (i.e. those with higher  $\lambda$ ). Right. Corresponding orbits in the I versus S+P plane for the sampled points in parameter space when the intervention effectiveness has been fixed. Parameter values:  $\beta = 1.5, \gamma = 1, \lambda_1 = 100, \delta_1 = 0.1, \lambda_2 = 1, \delta_2 = 0.1$ . Initial conditions:  $I(0) = 10^{-8}, P_1(0) = P_2(0) = R(0) = 0$ .

## Proving Underdamped Regime Eliminates Epidemic Overshoot

In general, the nonlinear feedback between the protected classes and infected individuals make it difficult to make analytical calculations in the full model. Under some simplifications however, we can make some progress. In this section, we derive the epidemic size at which the protection saturates in a restricted case of the homogeneous model ( $n = 1$ ).

Let us consider the homogeneous model in the limit of an intervention with perfect effectiveness (i.e.  $\epsilon = 1$ ). We will consider the case where the recovery rate from infection and relaxation rate for interventions are comparable (i.e.  $\gamma = \delta$ ). Since the equation for recovered individuals can be ignored since the population is closed ( $S + P + I + R = 1$ ), this reduces the dynamics to the following system:

$$\frac{dS}{dt} = -\beta SI - \lambda SI + \gamma P \quad (15)$$

$$\frac{dP}{dt} = \lambda SI - \gamma P \quad (16)$$

$$\frac{dI}{dt} = \beta SI - \gamma I \quad (17)$$

$$S(0) = f, P(0) = 0, I(0) = \alpha, R(0) = 1 - f - \alpha \quad (18)$$

The initial conditions sets the number of individuals initially susceptible to be  $f$ , the number of initially infected is assumed to be small  $I(0) \ll 1$ , and the remainder of the population is already immune to infection (i.e. recovered). To ensure that the epidemic initially grows in size, we assume that  $S(0) > \frac{1}{R_0}$ . This follows from comparing the incidence term ( $\beta SI$ ) to the recovery term ( $\gamma I$ ) in 17.

To find the asymptotic behavior for  $S$ , we will attempt to eliminate  $P$  from (15). We start first by seeking an equation that relates the  $P$  and  $I$  compartments. Consider the following ansatz that considers the difference between the two compartments:

$$x = \frac{\beta}{\lambda} P - I \quad (19)$$

Differentiating this equation with respect to time and using (16)-(17) yields:

$$\frac{dx}{dt} = \gamma \left( I - \frac{\beta}{\lambda} P \right) \quad (20)$$

Using (19), this simplifies to  $\frac{dx}{dt} = -\gamma x$ , which has a critical point at  $x = 0$ . At  $x = 0$ , we obtain that  $P = \frac{\lambda}{\beta} I$ , indicating a regime where the behavior of  $P$  and  $I$  scale linearly with each other. Combining this with (15) yields:

$$\frac{dS}{dt} = \left( -(\beta + \lambda)S + \frac{\gamma\lambda}{\beta} \right) I \quad (21)$$

Now that we have an equation that is linear in  $I$ , we are in a good position to find a final size relationship for the number of susceptibles. To start we take the ratio of (17) and (21).

$$\frac{dI}{dS} = \frac{\beta SI - \gamma I}{\left( -(\beta + \lambda)S + \frac{\gamma\lambda}{\beta} \right) I} \quad (22)$$

Using the partial fractions  $\frac{-\beta}{\beta+\lambda}$  and  $\frac{\frac{\gamma\lambda}{\beta}}{\left( (\beta+\lambda)S - \frac{\gamma\lambda}{\beta} \right)}$ , we get upon indefinite integration of (22) that

$k = \frac{\beta}{\beta+\lambda} \left( \frac{\gamma}{\beta+\lambda} \ln \left( (\beta + \lambda)S - \frac{\gamma\lambda}{\beta} \right) - S \right) - I$ , where  $k$  is a constant that holds throughout the trajectory of the dynamics. Thus, considering the values of  $S$  and  $I$  at the beginning of the epidemic ( $t = 0$ ) and the end of the epidemic ( $t = \infty$ ) and using the conditions that  $I(\infty) = 0$  and  $I(0) \approx 0$  yields the following transcendental equation for the final epidemic size.

$$\frac{\beta}{\beta + \lambda} \left( \frac{\gamma}{\beta + \lambda} \ln \left( (\beta + \lambda)S(0) - \frac{\gamma\lambda}{\beta} \right) - S(0) \right) = \frac{\beta}{\beta + \lambda} \left( \frac{\gamma}{\beta + \lambda} \ln \left( (\beta + \lambda)S(\infty) - \frac{\gamma\lambda}{\beta} \right) - S(\infty) \right) \quad (23)$$

Since  $S(0) > \frac{1}{R_0}$ , then the argument of the logarithm on the left hand side must be positive, and subsequently the left hand side evaluates to a real number. Due to the equality, the right hand side must also evaluate to a real number,

implying the argument of the logarithm on the right hand side must also be positive. Positivity implies the following inequality for the lower bound for the final number of susceptibles:

$$S(\infty) > \frac{\gamma\lambda}{\beta(\beta + \lambda)} \quad (24)$$

An upper bound can be given by simply noting that in the long time limit, the recovery term ( $\gamma I$ ) must be at least as large as the incidence term ( $\beta S(\infty)I$ ) in (17), otherwise the epidemic would still be growing. This implies  $S(\infty) \leq \frac{1}{R_0}$ .

To summarize, when the interventions are perfectly effective, the rate of relaxation from the protected class is equal to the rate of recovery from infection, and the number in the protected class scales linearly with the number of infected, then the final fraction of susceptibles is bounded as follows:

$$\frac{\lambda}{R_0(\beta + \lambda)} < S(\infty) \leq \frac{1}{R_0} \quad (25)$$

We see in the parameter limit of when the adoption rate of interventions is very fast compared to the transmission rate (i.e.  $\lambda \gg \beta$ ), that the lower bound reduces to  $\frac{1}{R_0}$ . Since both bounds now coincide, then  $S_\infty$  must equal that value. Interestingly this corresponds to the herd immunity threshold of the standard SIR model. As the overshoot is the excess number of cases beyond the herd immunity threshold, we see that in this parameter limit there is no overshoot.

This analysis for the homogeneous case also carries over to the heterogeneous case for two groups when the adoption rate between the two groups is significantly different (i.e.  $\lambda_1 \gg \lambda_2$ ). This results in a separation of time scales in which the faster adopters quickly transition to the protected state and can essentially be treated as immune over the course of the remaining epidemic over the slow adopters. This amounts to effectively reducing the dynamics to the homogeneous model considered here where  $f$  and  $1 - f$  fractions of the population in the susceptible and recovered respectively correspond to the fraction of the population in the slow adopter ( $\lambda_2$ ) and fast adopter groups ( $\lambda_1$ ).

## Heterogeneity in Risk Tolerance through Arithmetic Averaging

There are two ways for calculating the difference (heterogeneity) in adoption rates, either through geometric or arithmetic averaging. Both can be justified, and we presented the geometric formulation in the main text. We find that the arithmetic formulation gives qualitative similar results under a suitable parameter shift (Figure S6).

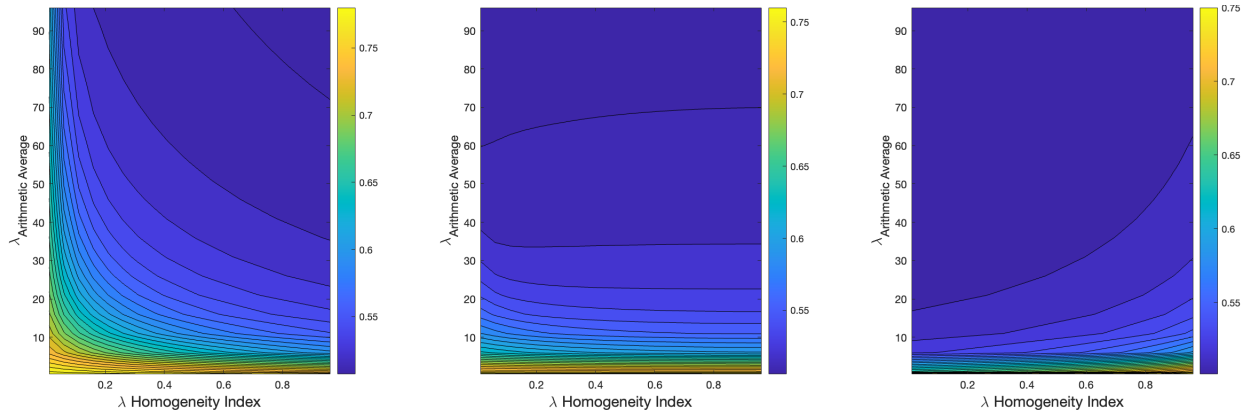

Figure S6: Epidemic size under differing levels of heterogeneity in the adoption rate for interventions. The mean adoption rate of the two groups (i.e. arithmetic average of  $\lambda_1, \lambda_2$ ) is compared to the difference in the two adoption rates as parameterized by a homogeneity index (see Methods for definition). *Left* is when the fraction of the population with low risk tolerance ( $x_1$ ) is 0.2, *center* is when  $x_1 = 0.5$ , *right* is when  $x_1 = 0.8$ . Parameter values:  $\beta = 2, \gamma = 1, \epsilon = 0.7, \delta_1 = \delta_2 = 0.5$ . Initial conditions:  $I(0) = 10^{-8}, P_1(0) = P_2(0) = R(0) = 0$ .

### Heterogeneity in Relaxation Rates of Protection

In the main text we primarily assumed that the relaxation rate in both groups were homogeneous for simplicity (i.e.  $\delta_1 = \delta_2$ ). However, in the real world, one might actually expect for them to be inversely correlated with the intervention adoption rates, such that if  $\lambda_1 > \lambda_2$ , then  $\delta_1 < \delta_2$ . The intuition is that a more risk-averse person will adopt protection faster and relax the protection at a slower rate. We numerically study if we allow for heterogeneous relaxation rates. As one might expect, our numerical results that the behavior of the epidemic size is intermediate between the two homogeneous extremes. (Figure S7).

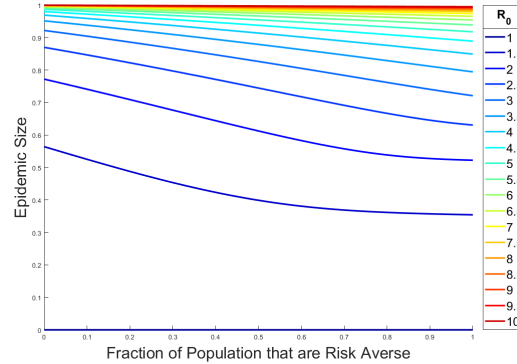

(a)  $\epsilon = 0.5, \delta_1 = \delta_2 = 1$

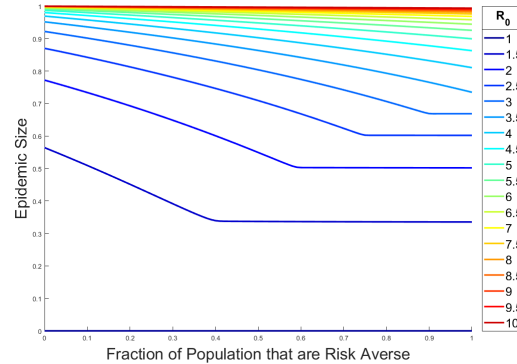

(b)  $\epsilon = 0.5, \delta_1 = 0.1, \delta_2 = 1$

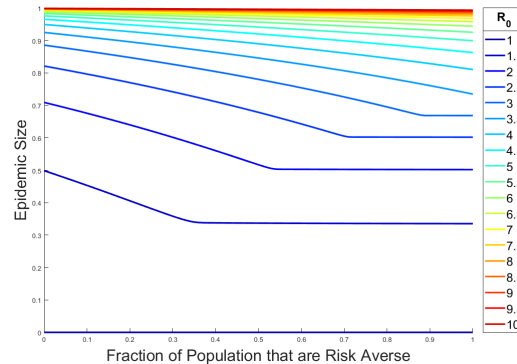

(c)  $\epsilon = 0.5, \delta_1 = \delta_2 = 0.1$

Figure S7: Final epidemic size versus fraction of population that are risk-averse ( $S_1$ ). Simulations in the left column have a higher  $\delta$  than simulations in the right column. Parameter values:  $R_0 = \beta, \gamma = 1, \lambda_1 = 100, \lambda_2 = 1$ . Initial conditions:  $I(0) = 10^{-8}, P_1(0) = P_2(0) = R(0) = 0$ .

## Code to Generate Figures

Code executed in MATLAB R2023a.

```
1  %% %%%%%%%%%%%%%%%%%%%%%%%%%%%%%%%%%%%%%%%%%%%%%%%%%%%%%%%%%%%%%%%%%%%%%%%%%%% Functions
2  %% %%%%%%%%%%%%%%%%%%%%%%%%%%%%%%%%%%%%%%%%%%%%%%%%%%%%%%%%%%%%%%%%%%%%%%%%%%%
3  function totalRecovered = plotSIRDynamics(susceptibleFrac, R0,
4      transmissionReduction, PlotOption, gamma, lambda1, delta1, lambda2,
5      delta2, modelType)
6
7  % Initial conditions
8  initialInfected = 0.00000001;
9  initialSusceptible1 = susceptibleFrac;%(1-initialInfected)/2;
10 initialSusceptible2 = 1-initialInfected-initialSusceptible1;
11 initialMasked1 = 0;
12 initialMasked2 = 0;
13 initialRecovered = 0;
14
15 % Time vector
16 tspan = [0 10000];
17
18 % SIR ODE system
19
20 %% Reversible w/ total level response
21 sirODE_level = @(t, y) [
22     -beta*y(1)*y(5) - lambda1*y(1)*y(5) + delta1*y(2);
23     -beta*(1-transmissionReduction)*y(2)*y(5) - delta1*y(2) + lambda1*y(1)
24     *y(5);
25     -beta*y(3)*y(5) - lambda2*y(3)*y(5) + delta2*y(4);
26     -beta*(1-transmissionReduction)*y(4)*y(5) - delta2*y(4) + lambda2*y(3)
27     *y(5);
28     beta*(y(1)+y(3))*y(5) + beta*(1-transmissionReduction)*(y(2)+y(4))*y
29     (5) - gamma*y(5);
30     gamma * y(5)];
31
32 %% Reversible w/ incidence rate response
33 sirODE_incidence = @(t, y) [
34     -beta*y(1)*y(5) - lambda1*y(1)*(beta*(y(1)+y(3))*y(5) + beta*(1-
35     transmissionReduction)*(y(2)+y(4))*y(5)) + delta1*y(2);
36     -beta*(1-transmissionReduction)*y(2)*y(5) - delta1*y(2) + lambda1*y(1)
37     *(beta*(y(1)+y(3))*y(5) + beta*(1-transmissionReduction)*(y(2)+y(4)
38     )*y(5));
39     -beta*y(3)*y(5) - lambda2*y(3)*(beta*(y(1)+y(3))*y(5) + beta*(1-
40     transmissionReduction)*(y(2)+y(4))*y(5)) + delta2*y(4);
41     -beta*(1-transmissionReduction)*y(4)*y(5) - delta2*y(4) + lambda2*y(3)
42     *(beta*(y(1)+y(3))*y(5) + beta*(1-transmissionReduction)*(y(2)+y(4)
43     )*y(5));
44     beta*(y(1)+y(3))*y(5) + beta*(1-transmissionReduction)*(y(2)+y(4))*y
45     (5) - gamma*y(5);
46     gamma * y(5)];
47
48 % Solve ODE
49 if modelType == 1
50     [t, y] = ode89(sirODE_level, tspan, [initialSusceptible1;
51     initialMasked1; initialSusceptible2; initialMasked2;
52     initialInfected; initialRecovered]);
```

```
42 else
43     [t, y] = ode89(sirODE_incidence, tspan, [initialSusceptible1;
        initialMasked1; initialSusceptible2; initialMasked2;
        initialInfected; initialRecovered]);
44 end
45
46 if PlotOption == 1
47     % Plot results
48     figure;
49     plot(t, y(:, 1), 'k-', 'LineWidth', 2, 'DisplayName', 'Susceptible -
        Type 1');
50     hold on;
51     plot(t, y(:, 3), 'b-', 'LineWidth', 2, 'DisplayName', 'Susceptible -
        Type 2');
52     plot(t, y(:, 2), 'g-', 'LineWidth', 2, 'DisplayName', 'Protected -
        Type 1');
53     plot(t, y(:, 4), 'm-', 'LineWidth', 2, 'DisplayName', 'Protected -
        Type 2');
54     plot(t, y(:, 5), 'r-', 'LineWidth', 2, 'DisplayName', 'Infected');
55     plot(t, y(:, 6), 'b-', 'LineWidth', 2, 'DisplayName', 'Recovered');
56     plot(t, y(:, 1)+y(:, 2)+y(:, 3)+y(:, 4), 'k.', 'LineWidth', 2, '
        DisplayName', 'Total Susceptible + Protected');
57     xlabel('Time');
58     ylabel('Proportion of Population');
59
60     ylim([0 1])
61     title(['\beta=', num2str(beta), ', \gamma=', num2str(gamma), ', \epsilon='
        , num2str(transmissionReduction), ', \lambda_1=', num2str(lambda1), ',
        \delta_1=', num2str(delta1), ', \lambda_2=', num2str(lambda2), ', \
        delta_2=', num2str(delta2), ', x_{S_1}=', num2str(susceptibleFrac)]);
62     legend('Location', 'eastoutside');
63     grid on;
64     hold off;
65
66 end
67
68 if PlotOption == 2
69     hold on
70     plot(y(:, 1)+y(:, 2)+y(:, 3)+y(:, 4), y(:, 5), 'b-')
71     xlabel('S+P')
72     ylabel('I')
73     ylim([0 .15])
74 end
75
76 totalRecovered = y(end, 6);
77 end
78
79 %%%%%%%%%%%%%%%%%%%%%%%%%%%%%%%%%%%%%%%%%%%%%%%%%%%%%%%%%%%%%%%%%%%%%%%%%%%%%%% Script
80 %%%%%%%%%%%%%%%%%%%%%%%%%%%%%%%%%%%%%%%%%%%%%%%%%%%%%%%%%%%%%%%%%%%%%%%%%%%%%%%
81 %%%%%%%%%%%%%%%%%%%%%%%%%%%%%%%%%%%%%%%%%%%%%%%%%%%%%%%%%%%%%%%%%%%%%%%%%%%%%%% Figure 2 %%%%%%%%%%%%%%%%%%%%%%%%%%%%%%%%%%%%%%%%%%%%%%%%%%%%%%%%%%%%%%%%%%%%%%%%%%%%%%%
82
83 %%%% SIR model parameters
84 R0 = 3; % Basic reproduction number
85 gamma = 1; % Recovery rate
86 beta = R0*gamma; % Transmission rate of unmasked susceptibles
87 transmissionReduction = 0.8; % Effectiveness of intervention (\epsilon)
88 lambda1 = 10; % Rate parameter for unprotected susceptibles to adopt
    intervention
```



```
89 delta1 = .01; % Rate parameter for protected individuals to remove
    intervention (mask)
90
91 PlotOption = 1; % Plotting parameter. If 1, then plot graph, otherwise
    none.
92
93 % Initial conditions
94 initialInfected = 0.000001; % Seed fraction of population that are
    initially infected
95 initialSusceptible1 = 1-initialInfected;
96 initialMasked1 = 0;
97 initialRecovered = 0;
98
99 % Time vector
100 tspan = [0 1500];
101
102 % SIR ODE system
103 %% Reversible w/ total level response
104 sirODE_level = @(t, y) [
105     -beta*y(1)*y(3) - lambda1*y(1)*y(3) + delta1*y(2);
106     -beta*(1-transmissionReduction)*y(2)*y(3) - delta1*y(2) + lambda1*y(1)
        *y(3);
107     beta*y(1)*y(3) + beta*(1-transmissionReduction)*y(2)*y(3) - gamma*y(3)
        ;
108     gamma * y(3)];
109
110 % Solve ODE
111 [t, y] = ode89(sirODE_level, tspan, [initialSusceptible1; initialMasked1;
    initialInfected; initialRecovered]);
112
113 if PlotOption == 1
114     % Plot results
115     figure;
116     subplot(1,2,1)
117     plot(t, y(:, 1), 'Color', [0.5 0.5 0.5], 'LineWidth', 2, 'DisplayName'
        , 'Susceptible'); % Gray
118     hold on;
119     plot(t, y(:, 2), 'g-', 'LineWidth', 2, 'DisplayName', 'Protected'); %
        Green
120     plot(t, y(:, 3), 'r-', 'LineWidth', 2, 'DisplayName', 'Infected'); %
        Red
121     plot(t, y(:, 4), 'Color', [0.5 0 0.5], 'LineWidth', 2, 'DisplayName',
        'Recovered'); % Purple
122     plot(t, y(:, 1)+y(:, 2), 'k-', 'LineWidth', 2, 'DisplayName', '
        Susceptible + Protected'); % Black
123
124     xlabel('Time', 'FontSize', 24);
125     ylabel('Fraction of Population', 'FontSize', 24);
126     ylim([0 1])
127     %title(['\beta=', num2str(beta), ', \gamma=', num2str(gamma), ', \epsilon
        =', num2str(transmissionReduction), ', \lambda_1=', num2str(lambda1)
        , ', \delta_1=', num2str(delta1)], 'FontSize', 24);
128     legend('Location', 'northeast', 'FontSize', 15);
129     grid on;
130     hold off;
131
132     subplot(1,2,2)
133     hold on
134     plot3(y(:, 1), y(:, 2), y(:, 3), 'b-')
```

```
135     xlabel('S', 'FontSize', 24);
136     ylabel('P', 'FontSize', 24);
137     zlabel('I', 'FontSize', 24);
138     xlim([0 1])
139     ylim([0 1])
140     zlim([0 .1])
141     set(gca, 'FontSize', 24); % Apply font size to the 3D plot axes
142 end
143
144 totalRecovered = y(end,4);
145
146
147 %%%%%%%%%%%%%%%%%%%%%%%%%%%%%%%%%%%%%%%%%%%%%%%%%%%%%%%%%%%%%%%%%%%%%%%%%%% Figure 3 %%%%%%%%%%%%%%%%%%%%%%%%%%%%%%%%%%%%%%%%%%%%%%%%%%%%%%%%%%%%%%%%%%%%%%%%%%%
148 susceptFracVec = 0:0.02:1;
149 R0vec = 2;
150 colorVec = jet(length(R0vec));
151 transmissionReduction = 0:0.02:1;
152
153 % SIR model parameters
154 gamma = 1; % Recovery rate
155 lambda1 = 100; % Rate of susceptibles with lower tolerance to switch to
    masked class
156 delta1 = .1; % Rate of masked class with lower tolerance for adoption to
    remove intervention (mask) to return to susceptible class
157 lambda2 = 1; % Rate of susceptibles with higher tolerance to switch to
    masked class
158 delta2 = .1; % Rate of masked class with higher tolerance for adoption to
    remove intervention (mask) to return to susceptible class
159
160 recoveredFracVec = zeros(length(susceptFracVec),length(
    transmissionReduction),length(R0vec));
161 xVec = zeros(length(susceptFracVec),length(transmissionReduction),length(
    R0vec));
162 effectivenessVec = zeros(length(susceptFracVec),length(
    transmissionReduction),length(R0vec));
163
164 for z = 1:length(R0vec)
165     for y = 1:length(transmissionReduction)
166         for x = 1:length(susceptFracVec)
167             recoveredFracVec(x,y,z) = plotSIRDynamics(susceptFracVec(x),
                R0vec(z),transmissionReduction(y), 0, gamma, lambda1,
                delta1, lambda2, delta2, 1);
168             xVec(x,y,z) = susceptFracVec(x);
169             effectivenessVec(x,y,z) = transmissionReduction(y);
170         end
171     end
172 end
173
174 figure
175
176 subplot(1,2,1)
177 [x_new, e_new] = meshgrid(susceptFracVec, transmissionReduction);
178 contourf(x_new,e_new,recoveredFracVec(:,:,z)', 'LevelStep', 0.01)
179 xlabel('Fraction of Population with Low Risk Tolerance', 'FontSize', 24)
180 ylabel('Effectiveness of Intervention (\epsilon)', 'FontSize', 24)
181 h = colorbar;
182
183 hold on
184 points_x = [0.05, 0.2,.9, 0.5, .95, .75];
```

```
185 points_y = [0.8, 0.1, .2,0.9, .85, .5];
186
187 scatter(points_x, points_y, 'r', 'filled')
188
189 labels = {'A', 'B', 'C', 'D', 'E', 'F'};
190 text(points_x, points_y, labels, 'Color', 'red', 'VerticalAlignment', '
    bottom', 'HorizontalAlignment', 'right', 'FontSize', 24)
191
192 subplot(1,2,2)
193
194 hold on
195 for a = 1:length(points_x)
196     plotSIRDynamics(points_x(a), R0vec(z),points_y(a), 2, gamma, lambda1,
197         delta1, lambda2, delta2, 1);
198 end
199 xlabel('S+P', 'FontSize', 24)
200 ylabel('I', 'FontSize', 24)
201
202 points_x = [0.5,0.4, .36, .85, .95, 0.72];
203 points_y = [0.025,0.13, 0.02,.01, .002, 0.02];
204
205 scatter(points_x, points_y, 'Marker', 'none')
206 labels = {'A', 'B', 'C', 'D', 'E', 'F'};
207 text(points_x, points_y, labels, 'Color', 'red', 'VerticalAlignment', '
    bottom', 'HorizontalAlignment', 'right', 'FontSize', 24)
208
209
210 %%%%%%%%%%%%%%%%%%%%%%%%%%%%%%%%%%%%%%%%%%%%%%%%%%%%%%%%%%%%%%%%%%%%%%%%%%% Figure 4 and S3 and S7
211 %%%%%%%%%%%%%%%%%%%%%%%%%%%%%%%%%%%%%%%%%%%%%%%%%%%%%%%%%%%%%%%%%%%%%%%%%%%
212 % Repeat for different parameter conditions to generate each panel
213
214 susceptibleFracVec = 0:0.01:1;
215 R0vec = 1:0.5:10;
216 colorVec = jet(length(R0vec));
217 transmissionReduction = .5;
218
219 % SIR model parameters
220 gamma = 1; % Recovery rate
221 lambda1 = 100; % Rate of susceptibles with lower tolerance to switch to
    masked class
222 lambda2 = 1; % Rate of susceptibles with higher tolerance to switch to
    masked class
223 delta1 = .1; % Rate of masked class with lower tolerance for adoption to
    remove intervention (mask) to return to susceptible class
224 delta2 = 1; % Rate of masked class with higher tolerance for adoption to
    remove intervention (mask) to return to susceptible class
225
226 recoveredFracVec = zeros(length(R0vec),length(susceptFracVec));
227 figure
228 hold on
229 for y = 1:length(R0vec)
230     for x = 1:length(susceptFracVec)
231         recoveredFracVec(y, x) = plotSIRDynamics(susceptFracVec(x), R0vec(
232             y),transmissionReduction, 0, gamma, lambda1, delta1, lambda2,
233             delta2, 1);
234     end
235 end
236 hold on
```

```
234     plot(susceptFracVec, recoveredFracVec(y,:), 'Color', colorVec(y,:), '
        LineWidth',2.5)
235 end
236
237 xlabel('Fraction of Population that are Risk Averse', 'FontSize', 24)
238 ylabel('Epidemic Size', 'FontSize', 24)
239 hLegend = legend(string(R0vec), 'Location', 'eastoutside', 'FontSize', 18)
        ;
240 title(hLegend, 'R_0')
241
242 %%%%%%%%%%%%%%%%%%%%%%%%%%%%%%%%%%%%%%%%%%%%%%%%%%%%%%%%%%%%%%%%%%%%%%%%%%% Figure 5 %%%%%%%%%%%%%%%%%%%%%%%%%%%%%%%%%%%%%%%%%%%%%%%%%%%%%%%%%%%%%%%%%%%%%%%%%%%
243 % Repeat for different parameter conditions to generate each panel
244
245 figure
246 susceptFracVec = 0.35;
247 R0vec = 2;
248 colorVec = jet(length(R0vec));
249 transmissionReduction = .7;
250
251 % SIR model parameters
252 cVec = [0.01:0.01:1];
253 lambdaAvg = [0.5, 1:1:100];
254 gamma = 1; % Recovery rate
255 delta1 = .5; % Rate of masked class with lower tolerance for adoption to
        remove intervention (mask) to return to susceptible class
256 delta2 = .5; % Rate of masked class with higher tolerance for adoption to
        remove intervention (mask) to return to susceptible class
257
258 recoveredFracVec = zeros(length(cVec),length(lambdaAvg));
259
260 for x = 1:length(cVec)
261     for y = 1:length(lambdaAvg)
262         recoveredFracVec(x,y) = plotSIRDynamics(susceptFracVec, R0vec,
            transmissionReduction, 0, gamma, lambdaAvg(y)/(cVec(x)^(
                susceptFracVec/(1-susceptFracVec))), delta1, cVec(x)*lambdaAvg(
                y), delta2, 1);
263     end
264 end
265
266 [c_new, l_new] = meshgrid(cVec, lambdaAvg);
267 contourf(c_new, l_new, recoveredFracVec, 'LevelStep', 0.01)
268 xlabel('\lambda Homogeneity Index', 'FontSize', 24)
269 ylabel('\lambda_{Geometric Average}', 'FontSize', 24)
270 h = colorbar;
271 ylabel(h, 'Epidemic Size', 'FontSize', 24, 'Rotation', 90);
272
273 %%%%%%%%%%%%%%%%%%%%%%%%%%%%%%%%%%%%%%%%%%%%%%%%%%%%%%%%%%%%%%%%%%%%%%%%%%% Figure 6 %%%%%%%%%%%%%%%%%%%%%%%%%%%%%%%%%%%%%%%%%%%%%%%%%%%%%%%%%%%%%%%%%%%%%%%%%%%
274
275 figure
276 susceptFracVec = 0:0.01:1;
277 R0vec = 1:0.5:7;
278 colorVec = jet(length(R0vec));
279 transmissionReduction = 1;
280
281 % SIR model parameters
282 gamma = 1; % Recovery rate
283 lambda1 = 10; % Rate of susceptibles with lower tolerance to switch to
        masked class
```

```
284 delta1 = .1; % Rate of masked class with lower tolerance for adoption to
      remove intervention (mask) to return to susceptible class
285 lambda2 = .5; % Rate of susceptibles with higher tolerance to switch to
      masked class
286 delta2 = .1; % Rate of masked class with higher tolerance for adoption to
      remove intervention (mask) to return to susceptible class
287
288
289 recoveredFracVec = zeros(length(R0vec),length(susceptFracVec));
290 hold on
291 for y = 1:length(R0vec)
292     for x = 1:length(susceptFracVec)
293         recoveredFracVec(y, x) = plotSIRDynamics(susceptFracVec(x), R0vec(
                y),transmissionReduction, 0, gamma, lambda1, delta1, lambda2,
                delta2, 1);
294     end
295     hold on
296     plot(susceptFracVec, recoveredFracVec(y,:), 'Color', colorVec(y,:), '
            LineWidth',2.5)
297 end
298
299 xlabel('Fraction of Population that are Risk Averse', 'FontSize', 24)
300 ylabel('Epidemic Size', 'FontSize', 24)
301 hLegend = legend(string(R0vec), 'Location', 'eastoutside', 'FontSize', 18)
      ;
302 title(hLegend, 'R_0')
303
304 susceptibleFracVec = 0:0.02:1;
305 R0vec = 2.5; % Only pick one R0 to show the surface plot for. Use other
      plot to pick the value of interest
306 colorVec = jet(length(R0vec));
307 transmissionReduction = 0:0.02:1;
308
309 recoveredFracVec = zeros(length(susceptFracVec),length(
      transmissionReduction),length(R0vec));
310 xVec = zeros(length(susceptFracVec),length(transmissionReduction),length(
      R0vec));
311 effectivenessVec = zeros(length(susceptFracVec),length(
      transmissionReduction),length(R0vec));
312
313 for z = 1:length(R0vec)
314     for y = 1:length(transmissionReduction)
315         for x = 1:length(susceptFracVec)
316             recoveredFracVec(x,y,z) = plotSIRDynamics(susceptFracVec(x),
                R0vec(z),transmissionReduction(y), 0, gamma, lambda1,
                delta1, lambda2, delta2, 1);
317             xVec(x,y,z) = susceptibleFracVec(x);
318             effectivenessVec(x,y,z) = transmissionReduction(y);
319         end
320     end
321 end
322
323 [X,Y,Z] = meshgrid(susceptFracVec,transmissionReduction,R0vec);
324
325 figure
326 for z = 1:length(R0vec)
327     surf(X(:,:,z), Y(:,:,z), recoveredFracVec(:,:,z), recoveredFracVec
            (:,:,z), 'FaceAlpha', 0.8, 'EdgeColor', 'interp');
328     hold on
```

```
329 end
330
331 xlabel('Fraction of Population that are Risk-Averse', 'FontSize', 18)
332 ylabel('Effectiveness of Intervention (\epsilon)', 'FontSize', 18)
333 zlabel('Epidemic Size', 'FontSize', 24)
334
335
336 %%%%%%%%%%%%%%%%%%%%%%%%%%%%%%%%%%%%%%%%%%%%%%%%%%%%%%%%%%%%%%%%%%%%%%%%%%% Figure S1 %%%%%%%%%%%%%%%%%%%%%%%%%%%%%%%%%%%%%%%%%%%%%%%%%%%%%%%%%%%%%%%%%%%%%%%%%%%
337
338 susceptFracVec = 0:0.02:1;
339 R0vec = 2;
340 colorVec = jet(length(R0vec));
341 transmissionReduction = 0:0.02:1;
342
343 % SIR model parameters
344 gamma = 1; % Recovery rate
345 lambda1 = 100; % Rate of susceptibles with lower tolerance to switch to
    masked class
346 delta1 = .1; % Rate of masked class with lower tolerance for adoption to
    remove intervention (mask) to return to susceptible class
347 lambda2 = 1; % Rate of susceptibles with higher tolerance to switch to
    masked class
348 delta2 = .1; % Rate of masked class with higher tolerance for adoption to
    remove intervention (mask) to return to susceptible class
349
350 recoveredFracVec = zeros(length(susceptFracVec),length(
    transmissionReduction),length(R0vec));
351 xVec = zeros(length(susceptFracVec),length(transmissionReduction),length(
    R0vec));
352 effectivenessVec = zeros(length(susceptFracVec),length(
    transmissionReduction),length(R0vec));
353
354 for z = 1:length(R0vec)
355     for y = 1:length(transmissionReduction)
356         for x = 1:length(susceptFracVec)
357             recoveredFracVec(x,y,z) = plotSIRDynamics(susceptFracVec(x),
                R0vec(z),transmissionReduction(y), 0, gamma, lambda1,
                delta1, lambda2, delta2, 0); % individuals adopt based on
                incidence
358             xVec(x,y,z) = susceptFracVec(x);
359             effectivenessVec(x,y,z) = transmissionReduction(y);
360         end
361     end
362 end
363
364
365 figure
366
367 subplot(1,2,1)
368 [x_new, e_new] = meshgrid(susceptFracVec, transmissionReduction);
369 contourf(x_new, e_new, recoveredFracVec(:,:,z)', 'LevelStep', 0.01)
370 xlabel('Fraction of Population with Low Risk Tolerance', 'FontSize', 14)
371 ylabel('Effectiveness of Intervention (\epsilon)', 'FontSize', 14)
372 h = colorbar;
373 title(h, 'Epidemic Size', 'FontSize', 14)
374 title(['R_0=' num2str(R0vec(z)), ', \lambda_1=' num2str(lambda1), ', \
    delta_1=' num2str(delta1), ', \lambda_2=' num2str(lambda2), ', \
    delta_2=' num2str(delta2)]);
375
```

```
376 hold on
377 points_x = 0.6*ones(100,1);
378 points_y = rand(100,1);
379
380 scatter(points_x, points_y, 'r', 'filled')
381
382 subplot(1,2,2)
383
384 for a = 1:length(points_x)
385     plotSIRDynamics(points_x(a), R0vec(z),points_y(a), 1, gamma, lambda1,
386                     delta1, lambda2, delta2, 0); % individuals adopt based on
387                     incidence
388
389 %%%%%%%%%%%%%%%%%%%%%%%%%%%%%%%%%%%%%%%%%%%%%%%%%%%%%%%%%%% Figure S2 %%%%%%%%%%%%%%%%%%%%%%%%%%%%%%%%%%%%%%%%%%%%%%%%%%%%%%%%%%%
390
391 susceptFracVec = 0:0.02:1;
392 R0vec = 2;
393 colorVec = jet(length(R0vec));
394 transmissionReduction = 0:0.02:1;
395
396 % SIR model parameters
397 gamma = 1; % Recovery rate
398 lambda1 = 100; % Rate of susceptibles with lower tolerance to switch to
399             % masked class
400 lambda2 = 1; % Rate of susceptibles with higher tolerance to switch to
401             % masked class
402 delta1 = .1; % Rate of masked class with lower tolerance for adoption to
403             % remove intervention (mask) to return to susceptible class
404 delta2 = .1; % Rate of masked class with higher tolerance for adoption to
405             % remove intervention (mask) to return to susceptible class
406
407 recoveredFracVec = zeros(length(susceptFracVec),length(
408             transmissionReduction),length(R0vec));
409 xVec = zeros(length(susceptFracVec),length(transmissionReduction),length(
410             R0vec));
411 effectivenessVec = zeros(length(susceptFracVec),length(
412             transmissionReduction),length(R0vec));
413
414 for z = 1:length(R0vec)
415     for y = 1:length(transmissionReduction)
416         for x = 1:length(susceptFracVec)
417             recoveredFracVec(x,y,z) = plotSIRDynamics(susceptFracVec(x),
418                 R0vec(z),transmissionReduction(y), 0, gamma, lambda1,
419                 delta1, lambda2, delta2, 0); % individuals adopt based on
420                 incidence
421             xVec(x,y,z) = susceptFracVec(x);
422             effectivenessVec(x,y,z) = transmissionReduction(y);
423         end
424     end
425 end
426
427 figure
428
429 subplot(1,2,1)
430 [x_new, e_new] = meshgrid(susceptFracVec, transmissionReduction);
431 contourf(x_new, e_new, recoveredFracVec(:,:,z)', 'LevelStep', 0.01)
```

```
423 xlabel('Fraction of Population with Low Risk Tolerance', 'FontSize', 14)
424 ylabel('Effectiveness of Intervention (\epsilon)', 'FontSize', 14)
425 h = colorbar;
426 title(h, 'Epidemic Size', 'FontSize', 14)
427 title(['R_0=', num2str(R0vec(z)), ', \lambda_1=', num2str(lambda1), ', \
      delta_1=', num2str(delta1), ', \lambda_2=', num2str(lambda2), ', \
      delta_2=', num2str(delta2)]);
428
429 hold on
430 points_x = rand(100,1);
431 points_y = 0.3*ones(100,1);
432
433 scatter(points_x, points_y, 'r', 'filled')
434
435 subplot(1,2,2)
436
437 for a = 1:length(points_x)
438     plotSIRDynamics(points_x(a), R0vec(z), points_y(a), 1, gamma, lambda1,
439                   delta1, lambda2, delta2, 0); % individuals adopt based on incidence
440 end
441 %%%%%%%%%%%%%%%%%%%%%%%%%%%%%%%%%%%%%%%%%%%%%%%%%%%%%%%%%%%%%%%%%%%%%%%%%%% Figure S4 %%%%%%%%%%%%%%%%%%%%%%%%%%%%%%%%%%%%%%%%%%%%%%%%%%%%%%%%%%%%%%%%%%%%%%%%%%%
442
443 susceptFracVec = 0:0.02:1;
444 R0vec = 2;
445 colorVec = jet(length(R0vec));
446 transmissionReduction = 0:0.02:1;
447
448 % SIR model parameters
449 gamma = 1; % Recovery rate
450 lambda1 = 100; % Rate of susceptibles with lower tolerance to switch to
      masked class
451 delta1 = .1; % Rate of masked class with lower tolerance for adoption to
      remove intervention (mask) to return to susceptible class
452 lambda2 = 1; % Rate of susceptibles with higher tolerance to switch to
      masked class
453 delta2 = .1; % Rate of masked class with higher tolerance for adoption to
      remove intervention (mask) to return to susceptible class
454
455 recoveredFracVec = zeros(length(susceptFracVec), length(
      transmissionReduction), length(R0vec));
456 xVec = zeros(length(susceptFracVec), length(transmissionReduction), length(
      R0vec));
457 effectivenessVec = zeros(length(susceptFracVec), length(
      transmissionReduction), length(R0vec));
458
459 for z = 1:length(R0vec)
460     for y = 1:length(transmissionReduction)
461         for x = 1:length(susceptFracVec)
462             recoveredFracVec(x,y,z) = plotSIRDynamics(susceptFracVec(x),
463               R0vec(z), transmissionReduction(y), 0, gamma, lambda1,
464               delta1, lambda2, delta2, 1); % individuals adopt based on
465               infection level
466             xVec(x,y,z) = susceptFracVec(x);
467             effectivenessVec(x,y,z) = transmissionReduction(y);
468         end
469     end
470 end
```



```
469
470 figure
471
472 subplot(1,2,1)
473 [x_new, e_new] = meshgrid(susceptFracVec, transmissionReduction);
474 contourf(x_new,e_new,recoveredFracVec(:,:,z)', 'LevelStep', 0.01)
475 xlabel('Fraction of Population with Low Risk Tolerance', 'FontSize', 14)
476 ylabel('Effectiveness of Intervention (\epsilon)', 'FontSize', 14)
477 h = colorbar;
478 title(h, 'Epidemic Size', 'FontSize', 14)
479 title(['R_0=', num2str(R0vec(z)), ', \lambda_1=', num2str(lambda1), ', \
      delta_1=', num2str(delta1), ', \lambda_2=', num2str(lambda2), ', \
      delta_2=', num2str(delta2)]);
480
481 hold on
482 points_x = 0.6*ones(100,1);
483 points_y = rand(100,1);
484
485 scatter(points_x, points_y, 'r', 'filled')
486
487 subplot(1,2,2)
488
489 for a = 1:length(points_x)
490     plotSIRDynamics(points_x(a), R0vec(z),points_y(a), 1, gamma, lambda1,
491                    delta1, lambda2, delta2, 1); % individuals adopt based on infection
492                    level
491 end
492
493
494 %%%%%%%%%%%%%%%%%%%%%%%%%%%%%%%%%%%%%%%%%%%%%%%%%%%%%%%%%%%%%%%%%%%%%%%%%%% Figure S5 %%%%%%%%%%%%%%%%%%%%%%%%%%%%%%%%%%%%%%%%%%%%%%%%%%%%%%%%%%%%%%%%%%%%%%%%%%%
495
496 susceptFracVec = 0:0.02:1;
497 R0vec = 2;
498 colorVec = jet(length(R0vec));
499 transmissionReduction = 0:0.02:1;
500
501 % SIR model parameters
502 gamma = 1; % Recovery rate
503 lambda1 = 100; % Rate of susceptibles with lower tolerance to switch to
504     masked class
505 delta1 = .1; % Rate of masked class with lower tolerance for adoption to
506     remove intervention (mask) to return to susceptible class
507 lambda2 = 1; % Rate of susceptibles with higher tolerance to switch to
508     masked class
509 delta2 = .1; % Rate of masked class with higher tolerance for adoption to
510     remove intervention (mask) to return to susceptible class
511
512 recoveredFracVec = zeros(length(susceptFracVec),length(
513     transmissionReduction),length(R0vec));
514 xVec = zeros(length(susceptFracVec),length(transmissionReduction),length(
515     R0vec));
516 effectivenessVec = zeros(length(susceptFracVec),length(
517     transmissionReduction),length(R0vec));
518
519 for z = 1:length(R0vec)
520     for y = 1:length(transmissionReduction)
521         for x = 1:length(susceptFracVec)
522             recoveredFracVec(x,y,z) = plotSIRDynamics(susceptFracVec(x),
523                 R0vec(z),transmissionReduction(y), 0, gamma, lambda1,
```

```

                    delta1, lambda2, delta2, 1); % individuals adopt based on
                    infection level
516     xVec(x,y,z) = susceptFracVec(x);
517     effectivenessVec(x,y,z) = transmissionReduction(y);
518     end
519     end
520 end
521
522
523 figure
524
525 subplot(1,2,1)
526 [x_new, e_new] = meshgrid(susceptFracVec, transmissionReduction);
527 contourf(x_new,e_new,recoveredFracVec(:,:,z)', 'LevelStep', 0.01)
528 xlabel('Fraction of Population with Low Risk Tolerance', 'FontSize', 14)
529 ylabel('Effectiveness of Intervention (\epsilon)', 'FontSize', 14)
530 h = colorbar;
531 title(h, 'Epidemic Size', 'FontSize', 14)
532 title(['R_0=', num2str(R0vec(z)), ', \lambda_1=', num2str(lambda1), ', \
        delta_1=', num2str(delta1), ', \lambda_2=', num2str(lambda2), ', \
        delta_2=', num2str(delta2)]);
533
534 hold on
535 points_x = rand(100,1);
536 points_y = 0.3*ones(100,1);
537
538 scatter(points_x, points_y, 'r', 'filled')
539
540 subplot(1,2,2)
541
542 for a = 1:length(points_x)
543     plotSIRDynamics(points_x(a), R0vec(z),points_y(a), 1, gamma, lambda1,
                    delta1, lambda2, delta2, 1); % individuals adopt based on infection
                    level
544 end
545
546
547
548 %%%%%%%%%%%%%%%%%%%%%%%%%%%%%%%%%%%%%%%%%%%%%%%%%%%%%%%%%%%%%%%%%%%%%%%%%%% Figure S6 %%%%%%%%%%%%%%%%%%%%%%%%%%%%%%%%%%%%%%%%%%%%%%%%%%%%%%%%%%%%%%%%%%%%%%%%%%%
549 % Repeat this script with corresponding parameters to generate each panel
550
551 figure
552 susceptFracVec = 0.2;
553 R0vec = 2;
554 colorVec = jet(length(R0vec));
555 transmissionReduction = .7;
556
557 % SIR model parameters
558 cVec = [0.01:0.05:1];
559 lambdaAvg = [0.5, 1:5:100];
560 gamma = 1; % Recovery rate
561 delta1 = .5; % Rate of masked class with lower tolerance for adoption to
        remove intervention (mask) to return to susceptible class
562 delta2 = .5; % Rate of masked class with higher tolerance for adoption to
        remove intervention (mask) to return to susceptible class
563
564 recoveredFracVec = zeros(length(cVec),length(lambdaAvg));
565
566 for x = 1:length(cVec)
```

```
567     for y = 1:length(lambdaAvg)
568         recoveredFracVec(x,y) = plotSIRDynamics(susceptFracVec, R0vec,
            transmissionReduction, 0, gamma, lambdaAvg(y)*(1-susceptFracVec
            *cVec(x))/(1-susceptFracVec), delta1, cVec(x)*lambdaAvg(y),
            delta2, 1); %Arithmetic parameterization
569     end
570 end
571
572 [c_new, l_new] = meshgrid(cVec, lambdaAvg);
573 contourf(c_new,l_new,recoveredFracVec', 'LevelStep', 0.01)
574 xlabel('\lambda Homogeneity Index', 'FontSize', 14)
575 ylabel('\lambda_{Arithmetic Average}', 'FontSize', 14)
576 h = colorbar;
577 title(h, 'Epidemic Size', 'FontSize', 14)
578 title(['R_0=', num2str(R0vec), ', x_1=', num2str(susceptFracVec), ', \
    epsilon=', num2str(transmissionReduction), ', \delta_1=', num2str(
    delta1), ', \delta_2=', num2str(delta2)]);
```
